# Supplementary material
Source: publisher figshare collection journal article supplement (https://gsajournals.figshare.com/articles/dataset/_/7757252)
Supplement: Supplementary file 1 [file 2]

## Sheet: Table4_DAP_BLUPs
line_name	family	NAM_name	DAP_line_BLUPs	DAP_fixed_fam_effs	DAP_BLUPs
HR601S001	1	HR601S	-2.23072	0	-2.23072
HR601S002	1	HR601S	-1.85335	0	-1.85335
HR601S003	1	HR601S	-1.298	0	-1.298
HR601S004	1	HR601S	-4.06778	0	-4.06778
HR601S005	1	HR601S	-1.93699	0	-1.93699
HR601S006	1	HR601S	-5.85048	0	-5.85048
HR601S007	1	HR601S	-5.33699	0	-5.33699
HR601S008	1	HR601S	-2.45115	0	-2.45115
HR601S009	1	HR601S	-7.71686	0	-7.71686
HR601S010	1	HR601S	6.0487	0	6.0487
HR601S011	1	HR601S	-2.82697	0	-2.82697
HR601S012	1	HR601S	-2.44809	0	-2.44809
HR601S013	1	HR601S	-4.20248	0	-4.20248
HR601S014	1	HR601S	-0.465897	0	-0.465897
HR601S015	1	HR601S	-0.297952	0	-0.297952
HR601S016	1	HR601S	-3.92975	0	-3.92975
HR601S017	1	HR601S	-3.40564	0	-3.40564
HR601S018	1	HR601S	-1.80543	0	-1.80543
HR601S019	1	HR601S	-0.47465	0	-0.47465
HR601S020	1	HR601S	-4.85585	0	-4.85585
HR601S021	1	HR601S	-1.42285	0	-1.42285
HR601S022	1	HR601S	-0.764053	0	-0.764053
HR601S023	1	HR601S	-3.90262	0	-3.90262
HR601S024	1	HR601S	-1.0216	0	-1.0216
HR601S025	1	HR601S	-2.2474	0	-2.2474
HR601S026	1	HR601S	-0.79178	0	-0.79178
HR601S027	1	HR601S	2.34491	0	2.34491
HR601S028	1	HR601S	-2.23966	0	-2.23966
HR601S029	1	HR601S	-0.068283	0	-0.068283
HR601S030	1	HR601S	0.0809155	0	0.0809155
HR601S031	1	HR601S	-2.94987	0	-2.94987
HR601S032	1	HR601S	-3.95321	0	-3.95321
HR601S033	1	HR601S	-3.40199	0	-3.40199
HR601S034	1	HR601S	1.49276	0	1.49276
HR601S035	1	HR601S	-4.41176	0	-4.41176
HR601S036	1	HR601S	0.425693	0	0.425693
HR601S037	1	HR601S	-4.91369	0	-4.91369
HR601S038	1	HR601S	4.2202	0	4.2202
HR601S039	1	HR601S	1.66468	0	1.66468
HR601S040	1	HR601S	-1.43698	0	-1.43698
HR601S042	1	HR601S	0.144253	0	0.144253
HR601S043	1	HR601S	-2.51247	0	-2.51247
HR601S044	1	HR601S	-4.23122	0	-4.23122
HR601S045	1	HR601S	-3.07484	0	-3.07484
HR601S046	1	HR601S	-0.30219	0	-0.30219
HR602S001	2	HR602S	-4.59553	-3.8683	-8.46382
HR602S002	2	HR602S	-4.7492	-3.8683	-8.61749
HR602S003	2	HR602S	-7.00964	-3.8683	-10.8779
HR602S004	2	HR602S	4.97158	-3.8683	1.10328
HR602S005	2	HR602S	3.05742	-3.8683	-0.810874
HR602S006	2	HR602S	5.58549	-3.8683	1.7172
HR602S008	2	HR602S	-5.41813	-3.8683	-9.28643
HR602S009	2	HR602S	4.29685	-3.8683	0.428549
HR602S010	2	HR602S	2.836	-3.8683	-1.03229
HR602S011	2	HR602S	-4.18216	-3.8683	-8.05046
HR602S012	2	HR602S	6.52503	-3.8683	2.65674
HR602S013	2	HR602S	2.48466	-3.8683	-1.38364
HR602S014	2	HR602S	-5.17784	-3.8683	-9.04613
HR602S015	2	HR602S	-4.93707	-3.8683	-8.80537
HR602S016	2	HR602S	2.46978	-3.8683	-1.39852
HR602S017	2	HR602S	2.44744	-3.8683	-1.42085
HR602S018	2	HR602S	-4.68352	-3.8683	-8.55181
HR602S019	2	HR602S	-2.96471	-3.8683	-6.83301
HR602S020	2	HR602S	-4.39768	-3.8683	-8.26598
HR602S021	2	HR602S	1.98625	-3.8683	-1.88204
HR602S022	2	HR602S	-5.23168	-3.8683	-9.09998
HR602S023	2	HR602S	-3.93863	-3.8683	-7.80693
HR602S024	2	HR602S	-1.35472	-3.8683	-5.22302
HR602S025	2	HR602S	6.80713	-3.8683	2.93883
HR602S026	2	HR602S	5.6843	-3.8683	1.816
HR602S027	2	HR602S	0.50048	-3.8683	-3.36782
HR602S028	2	HR602S	-4.62666	-3.8683	-8.49496
HR602S029	2	HR602S	3.0789	-3.8683	-0.789394
HR602S030	2	HR602S	-4.45768	-3.8683	-8.32598
HR602S031	2	HR602S	-3.81676	-3.8683	-7.68506
HR602S032	2	HR602S	-1.84881	-3.8683	-5.71711
HR602S033	2	HR602S	-2.08086	-3.8683	-5.94916
HR602S034	2	HR602S	-2.96447	-3.8683	-6.83277
HR602S035	2	HR602S	-6.18258	-3.8683	-10.0509
HR602S036	2	HR602S	-3.77891	-3.8683	-7.6472
HR602S037	2	HR602S	3.5868	-3.8683	-0.281493
HR602S038	2	HR602S	6.89627	-3.8683	3.02797
HR602S039	2	HR602S	-6.64446	-3.8683	-10.5128
HR602S040	2	HR602S	-4.42082	-3.8683	-8.28911
HR602S041	2	HR602S	0.911225	-3.8683	-2.95707
HR602S042	2	HR602S	3.6415	-3.8683	-0.2268
HR602S043	2	HR602S	-5.87963	-3.8683	-9.74793
HR602S044	2	HR602S	-4.77593	-3.8683	-8.64423
HR602S045	2	HR602S	2.36896	-3.8683	-1.49934
HR602S046	2	HR602S	-4.97398	-3.8683	-8.84227
HR602S047	2	HR602S	2.03477	-3.8683	-1.83353
HR602S048	2	HR602S	-4.15789	-3.8683	-8.02619
HR602S049	2	HR602S	2.11006	-3.8683	-1.75824
HR602S050	2	HR602S	-3.43099	-3.8683	-7.29929
HR602S051	2	HR602S	5.26824	-3.8683	1.39995
HR602S052	2	HR602S	-4.56732	-3.8683	-8.43561
HR602S053	2	HR602S	5.64782	-3.8683	1.77953
HR602S055	2	HR602S	-3.72364	-3.8683	-7.59194
HR602S056	2	HR602S	-3.11149	-3.8683	-6.97979
HR602S057	2	HR602S	4.43605	-3.8683	0.56775
HR602S058	2	HR602S	0.0717494	-3.8683	-3.79655
HR602S059	2	HR602S	1.66563	-3.8683	-2.20267
HR602S060	2	HR602S	-6.93366	-3.8683	-10.802
HR602S061	2	HR602S	1.77461	-3.8683	-2.09369
HR602S062	2	HR602S	-5.40616	-3.8683	-9.27445
HR602S063	2	HR602S	-1.9149	-3.8683	-5.7832
HR602S064	2	HR602S	-5.57735	-3.8683	-9.44565
HR602S065	2	HR602S	-5.56113	-3.8683	-9.42943
HR602S066	2	HR602S	1.15489	-3.8683	-2.71341
HR602S067	2	HR602S	5.43686	-3.8683	1.56857
HR602S068	2	HR602S	-4.00018	-3.8683	-7.86848
HR602S069	2	HR602S	3.79415	-3.8683	-0.0741512
HR602S070	2	HR602S	1.24164	-3.8683	-2.62666
HR602S071	2	HR602S	1.35941	-3.8683	-2.50889
HR603S005	3	HR603S	-1.28122	0.190518	-1.0907
HR603S006	3	HR603S	-9.66814	0.190518	-9.47763
HR603S007	3	HR603S	-2.91361	0.190518	-2.72309
HR603S008	3	HR603S	-6.54967	0.190518	-6.35915
HR603S009	3	HR603S	-7.17261	0.190518	-6.98209
HR603S010	3	HR603S	-5.20165	0.190518	-5.01113
HR603S011	3	HR603S	10.2095	0.190518	10.4
HR603S012	3	HR603S	-2.79714	0.190518	-2.60662
HR603S014	3	HR603S	-6.304	0.190518	-6.11348
HR603S016	3	HR603S	-8.16694	0.190518	-7.97642
HR603S017	3	HR603S	-0.0635755	0.190518	0.126943
HR603S018	3	HR603S	-9.50966	0.190518	-9.31915
HR603S019	3	HR603S	-3.57627	0.190518	-3.38575
HR603S020	3	HR603S	-0.615324	0.190518	-0.424806
HR603S021	3	HR603S	1.68982	0.190518	1.88034
HR603S022	3	HR603S	-9.86936	0.190518	-9.67884
HR603S023	3	HR603S	1.99946	0.190518	2.18997
HR603S024	3	HR603S	-7.77638	0.190518	-7.58586
HR603S025	3	HR603S	6.31306	0.190518	6.50358
HR603S026	3	HR603S	1.26831	0.190518	1.45882
HR603S027	3	HR603S	-5.2876	0.190518	-5.09708
HR603S028	3	HR603S	-1.28708	0.190518	-1.09656
HR603S029	3	HR603S	-4.95586	0.190518	-4.76534
HR603S030	3	HR603S	-1.44046	0.190518	-1.24994
HR603S031	3	HR603S	-7.59979	0.190518	-7.40928
HR603S032	3	HR603S	-5.18176	0.190518	-4.99124
HR603S033	3	HR603S	-6.96738	0.190518	-6.77686
HR603S034	3	HR603S	-5.13104	0.190518	-4.94053
HR603S035	3	HR603S	-10.2449	0.190518	-10.0544
HR603S036	3	HR603S	-7.22241	0.190518	-7.03189
HR603S037	3	HR603S	0.301741	0.190518	0.492259
HR604S001	4	HR604S	2.02638	0.908109	2.93449
HR604S002	4	HR604S	3.56158	0.908109	4.46969
HR604S004	4	HR604S	-1.26345	0.908109	-0.355342
HR604S005	4	HR604S	-0.486406	0.908109	0.421703
HR604S006	4	HR604S	-0.181306	0.908109	0.726803
HR604S007	4	HR604S	-2.61792	0.908109	-1.70981
HR604S008	4	HR604S	-1.25357	0.908109	-0.345457
HR604S009	4	HR604S	0.581384	0.908109	1.48949
HR604S010	4	HR604S	1.06981	0.908109	1.97792
HR604S011	4	HR604S	-3.96163	0.908109	-3.05353
HR604S012	4	HR604S	-2.9288	0.908109	-2.02069
HR604S013	4	HR604S	0.326965	0.908109	1.23507
HR604S014	4	HR604S	0.168368	0.908109	1.07648
HR604S015	4	HR604S	2.60398	0.908109	3.51209
HR604S016	4	HR604S	-1.22775	0.908109	-0.319638
HR604S017	4	HR604S	3.28109	0.908109	4.1892
HR604S019	4	HR604S	-2.24729	0.908109	-1.33918
HR604S020	4	HR604S	2.49883	0.908109	3.40694
HR604S021	4	HR604S	3.76402	0.908109	4.67213
HR604S022	4	HR604S	2.4583	0.908109	3.36641
HR604S023	4	HR604S	0.126628	0.908109	1.03474
HR604S024	4	HR604S	1.51698	0.908109	2.42509
HR604S025	4	HR604S	-3.94593	0.908109	-3.03782
HR604S026	4	HR604S	0.57169	0.908109	1.4798
HR604S027	4	HR604S	1.46837	0.908109	2.37647
HR604S028	4	HR604S	0.170307	0.908109	1.07842
HR604S029	4	HR604S	-2.86277	0.908109	-1.95466
HR604S030	4	HR604S	1.6688	0.908109	2.57691
HR604S031	4	HR604S	-1.70781	0.908109	-0.799701
HR604S032	4	HR604S	2.80739	0.908109	3.7155
HR604S034	4	HR604S	-2.06507	0.908109	-1.15696
HR604S035	4	HR604S	2.00143	0.908109	2.90954
HR604S037	4	HR604S	4.06751	0.908109	4.97562
HR604S039	4	HR604S	-2.20095	0.908109	-1.29285
HR604S040	4	HR604S	4.00901	0.908109	4.91712
HR604S041	4	HR604S	0.0156457	0.908109	0.923754
HR604S042	4	HR604S	1.62275	0.908109	2.53086
HR604S043	4	HR604S	-3.30828	0.908109	-2.40017
HR604S044	4	HR604S	1.49861	0.908109	2.40672
HR604S045	4	HR604S	2.43165	0.908109	3.33976
HR604S046	4	HR604S	0.500616	0.908109	1.40872
HR604S047	4	HR604S	-1.71739	0.908109	-0.809277
HR604S048	4	HR604S	1.48427	0.908109	2.39238
HR604S049	4	HR604S	-2.71221	0.908109	-1.8041
HR604S050	4	HR604S	6.89479	0.908109	7.8029
HR604S051	4	HR604S	0.850368	0.908109	1.75848
HR604S052	4	HR604S	0.715257	0.908109	1.62337
HR604S054	4	HR604S	1.32421	0.908109	2.23232
HR604S055	4	HR604S	6.66511	0.908109	7.57321
HR604S056	4	HR604S	-0.116338	0.908109	0.791771
HR604S057	4	HR604S	4.70861	0.908109	5.61671
HR604S059	4	HR604S	0.952416	0.908109	1.86053
HR604S060	4	HR604S	1.77055	0.908109	2.67866
HR604S061	4	HR604S	-1.11566	0.908109	-0.207551
HR604S062	4	HR604S	0.45914	0.908109	1.36725
HR604S063	4	HR604S	0.255761	0.908109	1.16387
HR604S065	4	HR604S	-2.55316	0.908109	-1.64505
HR604S066	4	HR604S	-0.882695	0.908109	0.0254135
HR604S067	4	HR604S	-2.91956	0.908109	-2.01145
HR604S068	4	HR604S	0.369732	0.908109	1.27784
HR604S069	4	HR604S	-0.237887	0.908109	0.670222
HR604S070	4	HR604S	3.9116	0.908109	4.81971
HR604S071	4	HR604S	0.364155	0.908109	1.27226
HR604S072	4	HR604S	-2.63531	0.908109	-1.7272
HR604S073	4	HR604S	-4.38458	0.908109	-3.47647
HR604S074	4	HR604S	-2.38201	0.908109	-1.4739
HR604S075	4	HR604S	-2.06521	0.908109	-1.1571
HR604S076	4	HR604S	0.661071	0.908109	1.56918
HR604S077	4	HR604S	4.10247	0.908109	5.01058
HR604S079	4	HR604S	-1.53324	0.908109	-0.625136
HR605S001	5	HR605S	3.9713	-4.18052	-0.209219
HR605S002	5	HR605S	-1.56193	-4.18052	-5.74245
HR605S004	5	HR605S	4.51859	-4.18052	0.33807
HR605S005	5	HR605S	4.13927	-4.18052	-0.0412528
HR605S006	5	HR605S	-0.970253	-4.18052	-5.15077
HR605S007	5	HR605S	-3.36406	-4.18052	-7.54459
HR605S009	5	HR605S	-2.08753	-4.18052	-6.26805
HR605S011	5	HR605S	-6.82566	-4.18052	-11.0062
HR605S013	5	HR605S	-4.57522	-4.18052	-8.75574
HR605S016	5	HR605S	6.1864	-4.18052	2.00588
HR605S017	5	HR605S	-0.817228	-4.18052	-4.99775
HR605S018	5	HR605S	-4.20933	-4.18052	-8.38985
HR605S019	5	HR605S	3.23827	-4.18052	-0.942253
HR605S020	5	HR605S	-3.25729	-4.18052	-7.43781
HR605S021	5	HR605S	-4.6498	-4.18052	-8.83032
HR605S022	5	HR605S	-3.48749	-4.18052	-7.66801
HR605S023	5	HR605S	4.15078	-4.18052	-0.0297446
HR605S024	5	HR605S	5.43958	-4.18052	1.25906
HR605S025	5	HR605S	1.08192	-4.18052	-3.0986
HR605S026	5	HR605S	-3.59449	-4.18052	-7.77501
HR605S027	5	HR605S	-4.82604	-4.18052	-9.00656
HR605S028	5	HR605S	-1.95795	-4.18052	-6.13847
HR605S029	5	HR605S	1.46768	-4.18052	-2.71284
HR605S030	5	HR605S	-4.54587	-4.18052	-8.72639
HR605S031	5	HR605S	0.487568	-4.18052	-3.69295
HR605S032	5	HR605S	3.16031	-4.18052	-1.02021
HR605S034	5	HR605S	-4.53802	-4.18052	-8.71854
HR605S035	5	HR605S	-3.69932	-4.18052	-7.87984
HR605S036	5	HR605S	6.49975	-4.18052	2.31922
HR605S037	5	HR605S	3.18049	-4.18052	-1.00003
HR605S038	5	HR605S	-3.23309	-4.18052	-7.41361
HR605S039	5	HR605S	-2.60321	-4.18052	-6.78373
HR605S040	5	HR605S	-2.97858	-4.18052	-7.1591
HR605S041	5	HR605S	-0.356877	-4.18052	-4.5374
HR605S042	5	HR605S	-5.42313	-4.18052	-9.60365
HR605S043	5	HR605S	1.29955	-4.18052	-2.88098
HR605S044	5	HR605S	1.24042	-4.18052	-2.94011
HR605S045	5	HR605S	-0.151277	-4.18052	-4.3318
HR605S046	5	HR605S	-1.43907	-4.18052	-5.61959
HR605S047	5	HR605S	4.63943	-4.18052	0.458909
HR605S048	5	HR605S	-5.1293	-4.18052	-9.30982
HR605S049	5	HR605S	3.11614	-4.18052	-1.06438
HR605S050	5	HR605S	2.94889	-4.18052	-1.23163
HR605S051	5	HR605S	-0.356564	-4.18052	-4.53709
HR605S052	5	HR605S	5.91406	-4.18052	1.73354
HR605S053	5	HR605S	2.17059	-4.18052	-2.00994
HR605S055	5	HR605S	1.94411	-4.18052	-2.23641
HR605S056	5	HR605S	1.74105	-4.18052	-2.43948
HR605S057	5	HR605S	-1.57998	-4.18052	-5.7605
HR605S059	5	HR605S	-5.32265	-4.18052	-9.50317
HR605S061	5	HR605S	0.39071	-4.18052	-3.78981
HR605S063	5	HR605S	2.83202	-4.18052	-1.3485
HR605S064	5	HR605S	-4.68388	-4.18052	-8.8644
HR605S066	5	HR605S	-5.02544	-4.18052	-9.20596
HR606S001	6	HR606S	-3.81289	-2.2949	-6.10779
HR606S002	6	HR606S	-2.35752	-2.2949	-4.65242
HR606S003	6	HR606S	0.877584	-2.2949	-1.41732
HR606S004	6	HR606S	-4.66562	-2.2949	-6.96052
HR606S005	6	HR606S	-6.28582	-2.2949	-8.58071
HR606S006	6	HR606S	3.20966	-2.2949	0.914766
HR606S007	6	HR606S	-2.59063	-2.2949	-4.88553
HR606S008	6	HR606S	0.568109	-2.2949	-1.72679
HR606S010	6	HR606S	5.57218	-2.2949	3.27728
HR606S013	6	HR606S	-3.95174	-2.2949	-6.24664
HR606S014	6	HR606S	3.05903	-2.2949	0.764129
HR606S015	6	HR606S	-2.60479	-2.2949	-4.89969
HR606S017	6	HR606S	9.42939	-2.2949	7.13449
HR606S019	6	HR606S	3.1554	-2.2949	0.860499
HR606S020	6	HR606S	-1.0043	-2.2949	-3.29919
HR606S021	6	HR606S	-1.94627	-2.2949	-4.24117
HR606S022	6	HR606S	5.29605	-2.2949	3.00115
HR606S024	6	HR606S	1.99982	-2.2949	-0.295081
HR606S025	6	HR606S	6.74846	-2.2949	4.45356
HR606S026	6	HR606S	-0.379371	-2.2949	-2.67427
HR606S027	6	HR606S	-5.49518	-2.2949	-7.79008
HR606S028	6	HR606S	3.81047	-2.2949	1.51557
HR606S029	6	HR606S	-1.66818	-2.2949	-3.96308
HR606S030	6	HR606S	4.79936	-2.2949	2.50446
HR606S032	6	HR606S	1.07799	-2.2949	-1.21691
HR606S033	6	HR606S	-3.3245	-2.2949	-5.6194
HR606S034	6	HR606S	-0.551847	-2.2949	-2.84675
HR606S035	6	HR606S	-5.2464	-2.2949	-7.5413
HR606S038	6	HR606S	6.61403	-2.2949	4.31913
HR606S039	6	HR606S	15.2085	-2.2949	12.9136
HR606S040	6	HR606S	-3.33573	-2.2949	-5.63063
HR606S042	6	HR606S	-1.28647	-2.2949	-3.58137
HR606S043	6	HR606S	-5.98274	-2.2949	-8.27764
HR606S044	6	HR606S	-5.28838	-2.2949	-7.58328
HR606S045	6	HR606S	-6.92691	-2.2949	-9.22181
HR606S047	6	HR606S	-5.15013	-2.2949	-7.44503
HR606S048	6	HR606S	-5.49351	-2.2949	-7.7884
HR606S049	6	HR606S	-4.43367	-2.2949	-6.72857
HR606S050	6	HR606S	-5.41532	-2.2949	-7.71022
HR606S052	6	HR606S	3.86839	-2.2949	1.57349
HR606S053	6	HR606S	-2.50248	-2.2949	-4.79738
HR606S054	6	HR606S	-4.00766	-2.2949	-6.30255
HR606S055	6	HR606S	-2.71591	-2.2949	-5.01081
HR606S057	6	HR606S	-3.52812	-2.2949	-5.82301
HR606S058	6	HR606S	2.07471	-2.2949	-0.220192
HR606S059	6	HR606S	12.2301	-2.2949	9.93522
HR606S060	6	HR606S	-3.95226	-2.2949	-6.24716
HR606S062	6	HR606S	-4.37568	-2.2949	-6.67058
HR606S063	6	HR606S	0.216456	-2.2949	-2.07844
HR606S064	6	HR606S	6.77518	-2.2949	4.48029
HR606S068	6	HR606S	4.52084	-2.2949	2.22594
HR606S069	6	HR606S	-2.529	-2.2949	-4.8239
HR606S070	6	HR606S	5.84561	-2.2949	3.55071
HR606S072	6	HR606S	-4.76656	-2.2949	-7.06145
HR607S001	7	HR607S	-4.80681	-2.47511	-7.28192
HR607S002	7	HR607S	-5.44547	-2.47511	-7.92058
HR607S003	7	HR607S	-3.62302	-2.47511	-6.09812
HR607S004	7	HR607S	5.47904	-2.47511	3.00393
HR607S005	7	HR607S	4.88918	-2.47511	2.41407
HR607S006	7	HR607S	-3.67947	-2.47511	-6.15458
HR607S007	7	HR607S	-4.56461	-2.47511	-7.03972
HR607S008	7	HR607S	-3.9952	-2.47511	-6.4703
HR607S009	7	HR607S	-4.21959	-2.47511	-6.6947
HR607S010	7	HR607S	3.51825	-2.47511	1.04314
HR607S011	7	HR607S	-3.77344	-2.47511	-6.24855
HR607S012	7	HR607S	-6.33551	-2.47511	-8.81062
HR607S013	7	HR607S	-0.865316	-2.47511	-3.34042
HR607S015	7	HR607S	2.14611	-2.47511	-0.328999
HR607S016	7	HR607S	-4.88669	-2.47511	-7.3618
HR607S017	7	HR607S	2.79926	-2.47511	0.324148
HR607S019	7	HR607S	9.50228	-2.47511	7.02717
HR607S021	7	HR607S	1.76105	-2.47511	-0.71406
HR607S022	7	HR607S	8.33567	-2.47511	5.86056
HR607S024	7	HR607S	-0.737098	-2.47511	-3.21221
HR607S025	7	HR607S	3.97476	-2.47511	1.49965
HR607S026	7	HR607S	4.58311	-2.47511	2.108
HR607S027	7	HR607S	1.02656	-2.47511	-1.44855
HR607S028	7	HR607S	-4.12737	-2.47511	-6.60248
HR607S029	7	HR607S	-3.11374	-2.47511	-5.58885
HR607S030	7	HR607S	1.67396	-2.47511	-0.801149
HR607S031	7	HR607S	2.1011	-2.47511	-0.374008
HR607S032	7	HR607S	1.79152	-2.47511	-0.683592
HR607S033	7	HR607S	2.91988	-2.47511	0.444769
HR607S034	7	HR607S	3.1432	-2.47511	0.668088
HR607S035	7	HR607S	1.2862	-2.47511	-1.18891
HR607S036	7	HR607S	1.37322	-2.47511	-1.10189
HR607S037	7	HR607S	0.00141121	-2.47511	-2.4737
HR607S038	7	HR607S	0.243005	-2.47511	-2.2321
HR607S039	7	HR607S	-5.56166	-2.47511	-8.03677
HR607S040	7	HR607S	-6.43721	-2.47511	-8.91232
HR607S041	7	HR607S	-1.18533	-2.47511	-3.66044
HR607S043	7	HR607S	7.61339	-2.47511	5.13828
HR607S044	7	HR607S	5.45361	-2.47511	2.9785
HR607S045	7	HR607S	8.78533	-2.47511	6.31022
HR607S046	7	HR607S	-1.63541	-2.47511	-4.11052
HR607S047	7	HR607S	-3.77407	-2.47511	-6.24918
HR607S049	7	HR607S	6.85404	-2.47511	4.37893
HR607S050	7	HR607S	-3.79411	-2.47511	-6.26922
HR607S051	7	HR607S	-4.73128	-2.47511	-7.20638
HR607S052	7	HR607S	1.93814	-2.47511	-0.536969
HR607S053	7	HR607S	-3.56153	-2.47511	-6.03663
HR607S054	7	HR607S	-6.06037	-2.47511	-8.53548
HR607S055	7	HR607S	7.44958	-2.47511	4.97447
HR607S056	7	HR607S	2.16287	-2.47511	-0.312241
HR607S057	7	HR607S	1.78622	-2.47511	-0.68889
HR607S058	7	HR607S	1.05039	-2.47511	-1.42472
HR607S059	7	HR607S	-0.024724	-2.47511	-2.49983
HR607S060	7	HR607S	3.5753	-2.47511	1.1002
HR607S061	7	HR607S	5.30871	-2.47511	2.8336
HR607S062	7	HR607S	-2.29507	-2.47511	-4.77018
HR607S063	7	HR607S	-4.78448	-2.47511	-7.25958
HR607S064	7	HR607S	-1.8571	-2.47511	-4.33221
HR607S065	7	HR607S	1.84649	-2.47511	-0.628614
HR607S066	7	HR607S	3.94944	-2.47511	1.47433
HR607S067	7	HR607S	-0.442215	-2.47511	-2.91732
HR607S068	7	HR607S	-5.47169	-2.47511	-7.9468
HR607S069	7	HR607S	4.16238	-2.47511	1.68727
HR607S070	7	HR607S	3.58382	-2.47511	1.10872
HR608S001	8	HR608S	2.05041	-3.16928	-1.11887
HR608S002	8	HR608S	0.248431	-3.16928	-2.92085
HR608S003	8	HR608S	-0.071505	-3.16928	-3.24079
HR608S004	8	HR608S	2.29545	-3.16928	-0.873829
HR608S006	8	HR608S	-4.55878	-3.16928	-7.72806
HR608S007	8	HR608S	7.87212	-3.16928	4.70284
HR608S008	8	HR608S	-2.61569	-3.16928	-5.78498
HR608S009	8	HR608S	-2.36801	-3.16928	-5.5373
HR608S010	8	HR608S	-0.609758	-3.16928	-3.77904
HR608S011	8	HR608S	-3.46542	-3.16928	-6.63471
HR608S012	8	HR608S	-3.19302	-3.16928	-6.3623
HR608S013	8	HR608S	7.15679	-3.16928	3.98751
HR608S014	8	HR608S	-2.5017	-3.16928	-5.67098
HR608S015	8	HR608S	-6.85035	-3.16928	-10.0196
HR608S018	8	HR608S	8.56596	-3.16928	5.39668
HR608S019	8	HR608S	1.31025	-3.16928	-1.85903
HR608S020	8	HR608S	-6.47855	-3.16928	-9.64783
HR608S021	8	HR608S	4.11745	-3.16928	0.94817
HR608S023	8	HR608S	0.472567	-3.16928	-2.69671
HR608S025	8	HR608S	1.18785	-3.16928	-1.98143
HR608S026	8	HR608S	-4.87606	-3.16928	-8.04535
HR608S027	8	HR608S	4.24678	-3.16928	1.0775
HR608S028	8	HR608S	0.381234	-3.16928	-2.78805
HR608S029	8	HR608S	3.52975	-3.16928	0.360471
HR608S031	8	HR608S	-6.8956	-3.16928	-10.0649
HR608S032	8	HR608S	-3.0792	-3.16928	-6.24848
HR608S033	8	HR608S	-1.65317	-3.16928	-4.82245
HR608S034	8	HR608S	-4.32831	-3.16928	-7.49759
HR608S036	8	HR608S	6.13092	-3.16928	2.96164
HR608S037	8	HR608S	-4.09557	-3.16928	-7.26486
HR608S038	8	HR608S	0.554187	-3.16928	-2.61509
HR608S039	8	HR608S	-0.00180908	-3.16928	-3.17109
HR608S040	8	HR608S	9.31666	-3.16928	6.14738
HR608S041	8	HR608S	-0.282976	-3.16928	-3.45226
HR608S042	8	HR608S	-5.28757	-3.16928	-8.45685
HR608S043	8	HR608S	-2.93027	-3.16928	-6.09955
HR608S044	8	HR608S	3.43318	-3.16928	0.263901
HR608S046	8	HR608S	-2.35759	-3.16928	-5.52688
HR608S047	8	HR608S	-2.07545	-3.16928	-5.24474
HR608S048	8	HR608S	-3.0678	-3.16928	-6.23708
HR608S049	8	HR608S	-1.42803	-3.16928	-4.59731
HR608S050	8	HR608S	-0.686233	-3.16928	-3.85551
HR608S053	8	HR608S	-6.45476	-3.16928	-9.62405
HR608S054	8	HR608S	2.01248	-3.16928	-1.1568
HR608S056	8	HR608S	3.72325	-3.16928	0.553973
HR608S057	8	HR608S	-2.32799	-3.16928	-5.49727
HR608S059	8	HR608S	-5.16969	-3.16928	-8.33897
HR608S061	8	HR608S	-2.23007	-3.16928	-5.39935
HR608S062	8	HR608S	7.2497	-3.16928	4.08042
HR608S063	8	HR608S	-1.64476	-3.16928	-4.81404
HR608S064	8	HR608S	2.32062	-3.16928	-0.848659
HR608S065	8	HR608S	4.36813	-3.16928	1.19885
HR608S066	8	HR608S	6.34779	-3.16928	3.17851
HR608S067	8	HR608S	-7.31802	-3.16928	-10.4873
HR608S068	8	HR608S	5.32014	-3.16928	2.15086
HR608S069	8	HR608S	9.95927	-3.16928	6.78999
HR608S070	8	HR608S	-4.83414	-3.16928	-8.00342
HR608S071	8	HR608S	-5.49909	-3.16928	-8.66837
HR608S072	8	HR608S	-0.235867	-3.16928	-3.40515
HR608S073	8	HR608S	-5.42284	-3.16928	-8.59212
HR608S074	8	HR608S	-2.38901	-3.16928	-5.55829
HR608S075	8	HR608S	4.70146	-3.16928	1.53218
HR608S076	8	HR608S	-5.43418	-3.16928	-8.60346
HR609S001	9	HR609S	-3.44991	-0.388851	-3.83876
HR609S002	9	HR609S	0.112776	-0.388851	-0.276075
HR609S003	9	HR609S	2.3702	-0.388851	1.98135
HR609S004	9	HR609S	-0.496307	-0.388851	-0.885157
HR609S005	9	HR609S	-3.74844	-0.388851	-4.13729
HR609S006	9	HR609S	-3.52966	-0.388851	-3.91851
HR609S007	9	HR609S	2.7041	-0.388851	2.31525
HR609S008	9	HR609S	1.15108	-0.388851	0.762228
HR609S009	9	HR609S	-5.1755	-0.388851	-5.56435
HR609S010	9	HR609S	-4.84829	-0.388851	-5.23714
HR609S011	9	HR609S	2.1457	-0.388851	1.75685
HR609S012	9	HR609S	6.77748	-0.388851	6.38863
HR609S013	9	HR609S	-1.49914	-0.388851	-1.88799
HR609S014	9	HR609S	3.6245	-0.388851	3.23565
HR609S015	9	HR609S	-2.09656	-0.388851	-2.48541
HR609S016	9	HR609S	-0.13405	-0.388851	-0.522901
HR609S017	9	HR609S	8.71677	-0.388851	8.32792
HR609S018	9	HR609S	11.8976	-0.388851	11.5087
HR609S019	9	HR609S	5.14612	-0.388851	4.75727
HR609S020	9	HR609S	7.85919	-0.388851	7.47034
HR609S021	9	HR609S	-4.58628	-0.388851	-4.97513
HR609S023	9	HR609S	2.54312	-0.388851	2.15427
HR609S024	9	HR609S	-2.73713	-0.388851	-3.12598
HR609S025	9	HR609S	0.154436	-0.388851	-0.234415
HR609S026	9	HR609S	-8.68028	-0.388851	-9.06913
HR609S027	9	HR609S	5.21815	-0.388851	4.8293
HR609S028	9	HR609S	-1.89479	-0.388851	-2.28364
HR609S029	9	HR609S	2.17957	-0.388851	1.79072
HR609S030	9	HR609S	10.8852	-0.388851	10.4963
HR609S031	9	HR609S	-1.6166	-0.388851	-2.00545
HR609S032	9	HR609S	-3.13204	-0.388851	-3.5209
HR609S033	9	HR609S	-2.97643	-0.388851	-3.36528
HR609S034	9	HR609S	-0.39692	-0.388851	-0.785771
HR609S035	9	HR609S	2.90138	-0.388851	2.51253
HR609S036	9	HR609S	0.143027	-0.388851	-0.245824
HR609S037	9	HR609S	0.327134	-0.388851	-0.0617166
HR609S038	9	HR609S	-1.75269	-0.388851	-2.14154
HR609S039	9	HR609S	-7.06003	-0.388851	-7.44888
HR609S040	9	HR609S	-0.597317	-0.388851	-0.986168
HR609S041	9	HR609S	1.68213	-0.388851	1.29328
HR609S042	9	HR609S	-7.67261	-0.388851	-8.06146
HR609S043	9	HR609S	-3.28106	-0.388851	-3.66991
HR609S044	9	HR609S	-1.47676	-0.388851	-1.86561
HR609S045	9	HR609S	3.58081	-0.388851	3.19196
HR609S046	9	HR609S	-2.90797	-0.388851	-3.29682
HR609S047	9	HR609S	12.5057	-0.388851	12.1169
HR609S048	9	HR609S	-1.66288	-0.388851	-2.05173
HR609S049	9	HR609S	0.265906	-0.388851	-0.122945
HR609S050	9	HR609S	-0.377026	-0.388851	-0.765877
HR609S051	9	HR609S	-0.79499	-0.388851	-1.18384
HR609S052	9	HR609S	3.84759	-0.388851	3.45874
HR609S053	9	HR609S	7.80457	-0.388851	7.41572
HR609S054	9	HR609S	-3.03322	-0.388851	-3.42207
HR609S055	9	HR609S	2.80474	-0.388851	2.41589
HR609S056	9	HR609S	0.815803	-0.388851	0.426953
HR609S058	9	HR609S	-0.195915	-0.388851	-0.584766
HR609S059	9	HR609S	-0.502619	-0.388851	-0.89147
HR609S060	9	HR609S	8.4985	-0.388851	8.10965
HR609S062	9	HR609S	-0.46733	-0.388851	-0.856181
HR609S063	9	HR609S	-0.955059	-0.388851	-1.34391
HR609S064	9	HR609S	-3.74233	-0.388851	-4.13118
HR609S065	9	HR609S	-2.26858	-0.388851	-2.65743
HR609S066	9	HR609S	-0.586046	-0.388851	-0.974896
HR609S067	9	HR609S	-3.37181	-0.388851	-3.76066
HR609S068	9	HR609S	-6.83943	-0.388851	-7.22828
HR609S069	9	HR609S	5.92442	-0.388851	5.53557
HR609S070	9	HR609S	-5.99223	-0.388851	-6.38108
HR609S071	9	HR609S	-0.22364	-0.388851	-0.61249
HR609S073	9	HR609S	5.67121	-0.388851	5.28236
HR609S074	9	HR609S	-8.82265	-0.388851	-9.2115
HR610S001	10	HR610S	2.4877	-2.2562	0.231498
HR610S002	10	HR610S	2.44149	-2.2562	0.185292
HR610S003	10	HR610S	-1.43569	-2.2562	-3.69189
HR610S004	10	HR610S	-4.61734	-2.2562	-6.87354
HR610S005	10	HR610S	-0.503577	-2.2562	-2.75978
HR610S006	10	HR610S	4.4951	-2.2562	2.2389
HR610S007	10	HR610S	1.17776	-2.2562	-1.07844
HR610S008	10	HR610S	3.13376	-2.2562	0.877555
HR610S010	10	HR610S	-0.534691	-2.2562	-2.79089
HR610S011	10	HR610S	-1.60303	-2.2562	-3.85923
HR610S012	10	HR610S	-3.59098	-2.2562	-5.84719
HR610S013	10	HR610S	-0.149202	-2.2562	-2.4054
HR610S014	10	HR610S	-4.85459	-2.2562	-7.11079
HR610S015	10	HR610S	4.54177	-2.2562	2.28557
HR610S016	10	HR610S	2.01334	-2.2562	-0.242857
HR610S017	10	HR610S	-0.0908478	-2.2562	-2.34705
HR610S018	10	HR610S	-3.9502	-2.2562	-6.2064
HR610S019	10	HR610S	4.08384	-2.2562	1.82764
HR610S020	10	HR610S	7.1584	-2.2562	4.9022
HR610S021	10	HR610S	3.9711	-2.2562	1.7149
HR610S022	10	HR610S	3.70677	-2.2562	1.45057
HR610S023	10	HR610S	3.14808	-2.2562	0.891874
HR610S024	10	HR610S	2.99368	-2.2562	0.737474
HR610S025	10	HR610S	-2.9155	-2.2562	-5.1717
HR610S027	10	HR610S	1.99561	-2.2562	-0.260588
HR610S029	10	HR610S	1.34547	-2.2562	-0.910728
HR610S030	10	HR610S	-4.97119	-2.2562	-7.22739
HR610S031	10	HR610S	-3.60364	-2.2562	-5.85985
HR610S032	10	HR610S	1.82257	-2.2562	-0.433628
HR610S033	10	HR610S	-2.23357	-2.2562	-4.48977
HR610S034	10	HR610S	-5.39646	-2.2562	-7.65266
HR610S035	10	HR610S	2.21198	-2.2562	-0.0442225
HR610S036	10	HR610S	0.125815	-2.2562	-2.13039
HR610S037	10	HR610S	2.77262	-2.2562	0.516421
HR610S038	10	HR610S	3.80711	-2.2562	1.55091
HR610S039	10	HR610S	2.0041	-2.2562	-0.252098
HR610S040	10	HR610S	3.95242	-2.2562	1.69622
HR610S041	10	HR610S	0.46718	-2.2562	-1.78902
HR610S043	10	HR610S	3.9069	-2.2562	1.65069
HR610S044	10	HR610S	1.17399	-2.2562	-1.08221
HR610S045	10	HR610S	-0.714034	-2.2562	-2.97024
HR610S046	10	HR610S	2.81014	-2.2562	0.553933
HR610S047	10	HR610S	-0.147996	-2.2562	-2.4042
HR610S048	10	HR610S	-2.16142	-2.2562	-4.41762
HR610S049	10	HR610S	-1.86592	-2.2562	-4.12213
HR610S050	10	HR610S	-2.68214	-2.2562	-4.93835
HR610S052	10	HR610S	1.08163	-2.2562	-1.17457
HR610S053	10	HR610S	3.65734	-2.2562	1.40114
HR610S054	10	HR610S	-0.699224	-2.2562	-2.95543
HR610S055	10	HR610S	-1.34136	-2.2562	-3.59756
HR610S056	10	HR610S	-3.91359	-2.2562	-6.16979
HR610S057	10	HR610S	4.11201	-2.2562	1.85581
HR610S058	10	HR610S	2.18374	-2.2562	-0.072458
HR610S059	10	HR610S	4.29187	-2.2562	2.03567
HR610S060	10	HR610S	-6.60266	-2.2562	-8.85886
HR610S061	10	HR610S	-3.20558	-2.2562	-5.46178
HR610S062	10	HR610S	-3.49795	-2.2562	-5.75415
HR610S063	10	HR610S	0.180747	-2.2562	-2.07546
HR610S064	10	HR610S	0.767219	-2.2562	-1.48898
HR610S065	10	HR610S	-3.40532	-2.2562	-5.66153
HR610S066	10	HR610S	-1.018	-2.2562	-3.2742
HR610S067	10	HR610S	-1.62045	-2.2562	-3.87665
HR610S068	10	HR610S	-2.75073	-2.2562	-5.00693
HR610S069	10	HR610S	-2.30246	-2.2562	-4.55867
HR610S070	10	HR610S	-1.98421	-2.2562	-4.24041
HR610S071	10	HR610S	-1.59417	-2.2562	-3.85037
HR610S072	10	HR610S	-3.65239	-2.2562	-5.90859
HR610S073	10	HR610S	-2.70822	-2.2562	-4.96442
HR610S074	10	HR610S	3.67561	-2.2562	1.41941
HR610S075	10	HR610S	3.24001	-2.2562	0.983804
HR611S001	11	HR611S	6.3421	-0.367876	5.97423
HR611S002	11	HR611S	3.36577	-0.367876	2.99789
HR611S004	11	HR611S	3.49631	-0.367876	3.12843
HR611S005	11	HR611S	-4.58969	-0.367876	-4.95756
HR611S006	11	HR611S	3.71833	-0.367876	3.35045
HR611S007	11	HR611S	-0.401073	-0.367876	-0.76895
HR611S009	11	HR611S	-1.97769	-0.367876	-2.34556
HR611S010	11	HR611S	-0.0979211	-0.367876	-0.465798
HR611S011	11	HR611S	0.41369	-0.367876	0.0458133
HR611S012	11	HR611S	-1.37889	-0.367876	-1.74676
HR611S013	11	HR611S	-0.673499	-0.367876	-1.04138
HR611S014	11	HR611S	0.0789123	-0.367876	-0.288964
HR611S015	11	HR611S	0.319068	-0.367876	-0.0488087
HR611S016	11	HR611S	4.53139	-0.367876	4.16351
HR611S017	11	HR611S	-2.81614	-0.367876	-3.18402
HR611S018	11	HR611S	0.457559	-0.367876	0.0896823
HR611S019	11	HR611S	-1.70646	-0.367876	-2.07434
HR611S020	11	HR611S	2.25737	-0.367876	1.88949
HR611S021	11	HR611S	3.17518	-0.367876	2.8073
HR611S022	11	HR611S	-1.52575	-0.367876	-1.89363
HR611S023	11	HR611S	2.11476	-0.367876	1.74688
HR611S024	11	HR611S	-1.22575	-0.367876	-1.59363
HR611S025	11	HR611S	-2.10893	-0.367876	-2.4768
HR611S026	11	HR611S	7.85401	-0.367876	7.48613
HR611S027	11	HR611S	-3.49878	-0.367876	-3.86666
HR611S028	11	HR611S	-1.85834	-0.367876	-2.22621
HR611S029	11	HR611S	0.815165	-0.367876	0.447289
HR611S030	11	HR611S	-2.07441	-0.367876	-2.44229
HR611S031	11	HR611S	-3.24957	-0.367876	-3.61745
HR611S032	11	HR611S	1.95735	-0.367876	1.58947
HR611S033	11	HR611S	0.113129	-0.367876	-0.254747
HR611S034	11	HR611S	7.48517	-0.367876	7.1173
HR611S035	11	HR611S	3.09914	-0.367876	2.73127
HR611S036	11	HR611S	-1.88976	-0.367876	-2.25763
HR611S037	11	HR611S	-0.970596	-0.367876	-1.33847
HR611S039	11	HR611S	-2.28433	-0.367876	-2.65221
HR611S040	11	HR611S	7.6229	-0.367876	7.25502
HR611S041	11	HR611S	-0.373398	-0.367876	-0.741274
HR611S042	11	HR611S	0.979122	-0.367876	0.611246
HR611S043	11	HR611S	-4.37064	-0.367876	-4.73852
HR611S044	11	HR611S	0.229646	-0.367876	-0.13823
HR611S045	11	HR611S	-3.18515	-0.367876	-3.55303
HR611S046	11	HR611S	-0.309778	-0.367876	-0.677655
HR611S047	11	HR611S	-0.197504	-0.367876	-0.565381
HR611S048	11	HR611S	-0.437003	-0.367876	-0.804879
HR611S049	11	HR611S	1.07872	-0.367876	0.710841
HR611S050	11	HR611S	1.60123	-0.367876	1.23336
HR611S051	11	HR611S	-1.32275	-0.367876	-1.69063
HR611S052	11	HR611S	-1.53874	-0.367876	-1.90662
HR611S053	11	HR611S	-1.37715	-0.367876	-1.74503
HR611S054	11	HR611S	2.88767	-0.367876	2.5198
HR611S055	11	HR611S	3.70784	-0.367876	3.33997
HR611S056	11	HR611S	-1.45137	-0.367876	-1.81925
HR611S057	11	HR611S	-2.64533	-0.367876	-3.0132
HR611S058	11	HR611S	0.855114	-0.367876	0.487238
HR611S059	11	HR611S	2.34651	-0.367876	1.97864
HR611S060	11	HR611S	0.745167	-0.367876	0.377291
HR611S061	11	HR611S	2.42448	-0.367876	2.05661
HR611S062	11	HR611S	0.626179	-0.367876	0.258303
HR611S064	11	HR611S	-1.30029	-0.367876	-1.66817
HR611S065	11	HR611S	1.57739	-0.367876	1.20951
HR612S001	12	HR612S	-1.53542	-6.60985	-8.14527
HR612S002	12	HR612S	-3.31897	-6.60985	-9.92882
HR612S003	12	HR612S	-4.96919	-6.60985	-11.579
HR612S004	12	HR612S	0.647417	-6.60985	-5.96243
HR612S005	12	HR612S	-5.82068	-6.60985	-12.4305
HR612S006	12	HR612S	-1.96506	-6.60985	-8.57491
HR612S007	12	HR612S	2.90078	-6.60985	-3.70907
HR612S008	12	HR612S	-4.21669	-6.60985	-10.8265
HR612S009	12	HR612S	4.57402	-6.60985	-2.03582
HR612S010	12	HR612S	1.57541	-6.60985	-5.03444
HR612S011	12	HR612S	-2.37258	-6.60985	-8.98243
HR612S012	12	HR612S	4.29084	-6.60985	-2.319
HR612S013	12	HR612S	-1.57939	-6.60985	-8.18924
HR612S014	12	HR612S	4.38508	-6.60985	-2.22477
HR612S017	12	HR612S	2.15637	-6.60985	-4.45347
HR612S018	12	HR612S	2.84551	-6.60985	-3.76433
HR612S020	12	HR612S	1.33837	-6.60985	-5.27147
HR612S023	12	HR612S	-2.54357	-6.60985	-9.15342
HR612S024	12	HR612S	-2.68063	-6.60985	-9.29048
HR612S025	12	HR612S	2.1443	-6.60985	-4.46554
HR612S026	12	HR612S	2.57433	-6.60985	-4.03552
HR612S027	12	HR612S	-1.63341	-6.60985	-8.24325
HR612S028	12	HR612S	2.97179	-6.60985	-3.63806
HR612S029	12	HR612S	-2.3989	-6.60985	-9.00875
HR612S030	12	HR612S	4.66654	-6.60985	-1.94331
HR612S031	12	HR612S	-3.08886	-6.60985	-9.6987
HR612S032	12	HR612S	1.70581	-6.60985	-4.90404
HR612S033	12	HR612S	-2.57301	-6.60985	-9.18285
HR612S034	12	HR612S	1.75681	-6.60985	-4.85304
HR612S035	12	HR612S	-3.50515	-6.60985	-10.115
HR612S036	12	HR612S	6.07165	-6.60985	-0.538191
HR612S037	12	HR612S	4.48919	-6.60985	-2.12065
HR612S038	12	HR612S	-1.97067	-6.60985	-8.58052
HR612S039	12	HR612S	-2.40316	-6.60985	-9.01301
HR612S040	12	HR612S	1.10821	-6.60985	-5.50164
HR612S042	12	HR612S	-2.41042	-6.60985	-9.02026
HR612S044	12	HR612S	2.47692	-6.60985	-4.13293
HR612S045	12	HR612S	2.92558	-6.60985	-3.68426
HR612S046	12	HR612S	3.1874	-6.60985	-3.42244
HR612S047	12	HR612S	-2.43978	-6.60985	-9.04963
HR612S048	12	HR612S	-3.336	-6.60985	-9.94585
HR612S049	12	HR612S	-2.74828	-6.60985	-9.35813
HR612S050	12	HR612S	-4.69549	-6.60985	-11.3053
HR612S051	12	HR612S	-5.72616	-6.60985	-12.336
HR612S053	12	HR612S	-3.91286	-6.60985	-10.5227
HR612S054	12	HR612S	-3.75918	-6.60985	-10.369
HR612S055	12	HR612S	-1.63903	-6.60985	-8.24888
HR612S056	12	HR612S	-4.20639	-6.60985	-10.8162
HR612S057	12	HR612S	7.32274	-6.60985	0.712889
HR612S058	12	HR612S	0.898203	-6.60985	-5.71164
HR612S059	12	HR612S	0.214979	-6.60985	-6.39487
HR612S060	12	HR612S	2.21784	-6.60985	-4.39201
HR612S061	12	HR612S	5.15697	-6.60985	-1.45288
HR612S062	12	HR612S	-3.80613	-6.60985	-10.416
HR612S063	12	HR612S	-1.4125	-6.60985	-8.02235
HR612S064	12	HR612S	4.23738	-6.60985	-2.37246
HR612S065	12	HR612S	-2.62538	-6.60985	-9.23522
HR612S066	12	HR612S	3.18623	-6.60985	-3.42362
HR612S067	12	HR612S	1.42822	-6.60985	-5.18162
HR612S068	12	HR612S	0.0884803	-6.60985	-6.52137
HR612S069	12	HR612S	-1.61672	-6.60985	-8.22657
HR612S070	12	HR612S	-2.46835	-6.60985	-9.0782
HR612S071	12	HR612S	-3.59522	-6.60985	-10.2051
HR612S072	12	HR612S	3.08011	-6.60985	-3.52974
HR612S073	12	HR612S	-2.66938	-6.60985	-9.27923
HR612S074	12	HR612S	3.10944	-6.60985	-3.5004
HR612S075	12	HR612S	5.23557	-6.60985	-1.37428
HR612S076	12	HR612S	2.35738	-6.60985	-4.25247
HR613S002	13	HR613S	3.11938	-2.18278	0.936596
HR613S003	13	HR613S	0.881204	-2.18278	-1.30158
HR613S004	13	HR613S	-0.37088	-2.18278	-2.55366
HR613S005	13	HR613S	-0.310136	-2.18278	-2.49292
HR613S006	13	HR613S	1.3599	-2.18278	-0.822881
HR613S007	13	HR613S	-0.817176	-2.18278	-2.99996
HR613S009	13	HR613S	0.877858	-2.18278	-1.30492
HR613S010	13	HR613S	-0.369787	-2.18278	-2.55257
HR613S011	13	HR613S	-0.75783	-2.18278	-2.94061
HR613S012	13	HR613S	1.29949	-2.18278	-0.883295
HR613S013	13	HR613S	1.75321	-2.18278	-0.429568
HR613S014	13	HR613S	-1.12283	-2.18278	-3.30562
HR613S015	13	HR613S	-0.663407	-2.18278	-2.84619
HR613S016	13	HR613S	2.62034	-2.18278	0.437555
HR613S017	13	HR613S	0.968629	-2.18278	-1.21415
HR613S018	13	HR613S	-1.78137	-2.18278	-3.96415
HR613S019	13	HR613S	-0.996685	-2.18278	-3.17947
HR613S020	13	HR613S	3.60047	-2.18278	1.41768
HR613S021	13	HR613S	-1.19303	-2.18278	-3.37581
HR613S022	13	HR613S	0.544989	-2.18278	-1.63779
HR613S023	13	HR613S	-0.789857	-2.18278	-2.97264
HR613S024	13	HR613S	-0.132194	-2.18278	-2.31498
HR613S025	13	HR613S	3.12063	-2.18278	0.937844
HR613S026	13	HR613S	-1.86635	-2.18278	-4.04913
HR613S027	13	HR613S	-1.60858	-2.18278	-3.79136
HR613S028	13	HR613S	-2.37545	-2.18278	-4.55823
HR613S029	13	HR613S	4.98168	-2.18278	2.7989
HR613S030	13	HR613S	4.81755	-2.18278	2.63477
HR613S031	13	HR613S	3.41783	-2.18278	1.23505
HR613S032	13	HR613S	-0.428122	-2.18278	-2.6109
HR613S033	13	HR613S	-1.4358	-2.18278	-3.61858
HR613S034	13	HR613S	-0.906434	-2.18278	-3.08922
HR613S036	13	HR613S	2.13578	-2.18278	-0.0470051
HR613S037	13	HR613S	-0.379046	-2.18278	-2.56183
HR613S038	13	HR613S	3.389	-2.18278	1.20622
HR613S039	13	HR613S	4.03018	-2.18278	1.8474
HR613S040	13	HR613S	-1.0877	-2.18278	-3.27048
HR613S041	13	HR613S	3.40524	-2.18278	1.22246
HR613S042	13	HR613S	-1.6135	-2.18278	-3.79628
HR613S043	13	HR613S	-1.03158	-2.18278	-3.21436
HR613S044	13	HR613S	-1.38043	-2.18278	-3.56321
HR613S045	13	HR613S	1.77715	-2.18278	-0.40563
HR613S046	13	HR613S	-0.940854	-2.18278	-3.12364
HR613S047	13	HR613S	-5.69415	-2.18278	-7.87694
HR613S048	13	HR613S	-1.21444	-2.18278	-3.39722
HR613S049	13	HR613S	-3.62035	-2.18278	-5.80313
HR613S050	13	HR613S	-0.834015	-2.18278	-3.0168
HR613S051	13	HR613S	-2.04142	-2.18278	-4.2242
HR613S052	13	HR613S	-1.31648	-2.18278	-3.49926
HR613S053	13	HR613S	-3.87599	-2.18278	-6.05877
HR613S054	13	HR613S	-1.33142	-2.18278	-3.51421
HR613S055	13	HR613S	0.931243	-2.18278	-1.25154
HR613S056	13	HR613S	-2.70487	-2.18278	-4.88765
HR613S057	13	HR613S	3.76769	-2.18278	1.58491
HR613S058	13	HR613S	4.20447	-2.18278	2.02169
HR613S059	13	HR613S	0.753454	-2.18278	-1.42933
HR613S060	13	HR613S	-4.65927	-2.18278	-6.84205
HR613S061	13	HR613S	4.2842	-2.18278	2.10142
HR613S062	13	HR613S	-3.35475	-2.18278	-5.53753
HR613S063	13	HR613S	-3.36079	-2.18278	-5.54357
HR613S065	13	HR613S	0.462111	-2.18278	-1.72067
HR613S066	13	HR613S	3.64933	-2.18278	1.46655
HR613S067	13	HR613S	1.03219	-2.18278	-1.15059
HR613S068	13	HR613S	-2.46702	-2.18278	-4.6498
HR613S069	13	HR613S	2.25052	-2.18278	0.0677365
HR614S001	14	HR614S	-0.271143	-1.99256	-2.26371
HR614S002	14	HR614S	1.74918	-1.99256	-0.243381
HR614S003	14	HR614S	-1.80304	-1.99256	-3.7956
HR614S004	14	HR614S	3.4774	-1.99256	1.48484
HR614S005	14	HR614S	-0.368599	-1.99256	-2.36116
HR614S006	14	HR614S	1.54756	-1.99256	-0.445007
HR614S007	14	HR614S	4.12355	-1.99256	2.13099
HR614S008	14	HR614S	3.3346	-1.99256	1.34203
HR614S010	14	HR614S	4.01044	-1.99256	2.01787
HR614S011	14	HR614S	-2.5765	-1.99256	-4.56906
HR614S012	14	HR614S	-2.84	-1.99256	-4.83257
HR614S013	14	HR614S	-3.35075	-1.99256	-5.34331
HR614S014	14	HR614S	1.42223	-1.99256	-0.570338
HR614S015	14	HR614S	-3.35292	-1.99256	-5.34548
HR614S016	14	HR614S	-2.28303	-1.99256	-4.27559
HR614S017	14	HR614S	2.33319	-1.99256	0.340621
HR614S019	14	HR614S	4.47243	-1.99256	2.47987
HR614S020	14	HR614S	3.70952	-1.99256	1.71696
HR614S021	14	HR614S	-2.32116	-1.99256	-4.31373
HR614S022	14	HR614S	-0.0892214	-1.99256	-2.08179
HR614S023	14	HR614S	-2.4706	-1.99256	-4.46316
HR614S024	14	HR614S	-1.33578	-1.99256	-3.32835
HR614S026	14	HR614S	-1.7652	-1.99256	-3.75777
HR614S027	14	HR614S	1.81646	-1.99256	-0.176101
HR614S028	14	HR614S	-1.86616	-1.99256	-3.85872
HR614S029	14	HR614S	2.15787	-1.99256	0.165306
HR614S030	14	HR614S	0.132609	-1.99256	-1.85996
HR614S031	14	HR614S	-1.77878	-1.99256	-3.77135
HR614S032	14	HR614S	-1.14199	-1.99256	-3.13455
HR614S033	14	HR614S	-2.2342	-1.99256	-4.22676
HR614S034	14	HR614S	-2.34831	-1.99256	-4.34087
HR614S035	14	HR614S	-2.45358	-1.99256	-4.44615
HR614S036	14	HR614S	0.73914	-1.99256	-1.25343
HR614S037	14	HR614S	0.777068	-1.99256	-1.2155
HR614S038	14	HR614S	0.136631	-1.99256	-1.85593
HR614S039	14	HR614S	4.94791	-1.99256	2.95535
HR614S041	14	HR614S	5.79937	-1.99256	3.8068
HR614S042	14	HR614S	-3.14194	-1.99256	-5.13451
HR614S043	14	HR614S	-1.49085	-1.99256	-3.48342
HR614S044	14	HR614S	-4.0643	-1.99256	-6.05686
HR614S045	14	HR614S	3.27252	-1.99256	1.27995
HR614S046	14	HR614S	-3.50126	-1.99256	-5.49383
HR614S047	14	HR614S	2.84	-1.99256	0.84743
HR614S048	14	HR614S	-2.69298	-1.99256	-4.68554
HR614S049	14	HR614S	-4.11206	-1.99256	-6.10462
HR614S050	14	HR614S	4.1832	-1.99256	2.19063
HR614S051	14	HR614S	-2.61086	-1.99256	-4.60343
HR614S052	14	HR614S	-0.414914	-1.99256	-2.40748
HR614S053	14	HR614S	-1.77363	-1.99256	-3.76619
HR614S054	14	HR614S	-1.50169	-1.99256	-3.49426
HR614S056	14	HR614S	-1.56199	-1.99256	-3.55455
HR614S057	14	HR614S	4.6635	-1.99256	2.67093
HR614S058	14	HR614S	-0.259017	-1.99256	-2.25158
HR614S060	14	HR614S	-2.10664	-1.99256	-4.0992
HR614S061	14	HR614S	-1.65664	-1.99256	-3.6492
HR614S062	14	HR614S	-1.05477	-1.99256	-3.04734
HR614S063	14	HR614S	4.09854	-1.99256	2.10597
HR614S064	14	HR614S	4.66498	-1.99256	2.67241
HR614S065	14	HR614S	4.02533	-1.99256	2.03277
HR614S066	14	HR614S	2.25549	-1.99256	0.262926
HR614S067	14	HR614S	0.653349	-1.99256	-1.33922
HR614S068	14	HR614S	-2.15604	-1.99256	-4.14861
HR615S001	15	HR615S	-3.77449	-2.76718	-6.54167
HR615S002	15	HR615S	11.0064	-2.76718	8.23923
HR615S003	15	HR615S	4.46937	-2.76718	1.7022
HR615S004	15	HR615S	-4.23214	-2.76718	-6.99932
HR615S005	15	HR615S	-0.751002	-2.76718	-3.51818
HR615S006	15	HR615S	5.07614	-2.76718	2.30897
HR615S007	15	HR615S	6.80178	-2.76718	4.03461
HR615S008	15	HR615S	6.79004	-2.76718	4.02286
HR615S009	15	HR615S	-6.9904	-2.76718	-9.75758
HR615S010	15	HR615S	-4.18292	-2.76718	-6.9501
HR615S011	15	HR615S	4.31242	-2.76718	1.54524
HR615S012	15	HR615S	-4.53118	-2.76718	-7.29836
HR615S014	15	HR615S	5.37746	-2.76718	2.61028
HR615S015	15	HR615S	9.29045	-2.76718	6.52327
HR615S016	15	HR615S	5.87493	-2.76718	3.10775
HR615S017	15	HR615S	-1.13373	-2.76718	-3.90091
HR615S018	15	HR615S	-5.68267	-2.76718	-8.44985
HR615S019	15	HR615S	0.207257	-2.76718	-2.55992
HR615S020	15	HR615S	-3.37904	-2.76718	-6.14622
HR615S021	15	HR615S	7.36565	-2.76718	4.59847
HR615S022	15	HR615S	-6.27615	-2.76718	-9.04332
HR615S024	15	HR615S	-6.31203	-2.76718	-9.07921
HR615S025	15	HR615S	-5.81359	-2.76718	-8.58077
HR615S026	15	HR615S	5.42729	-2.76718	2.66011
HR615S027	15	HR615S	-5.40316	-2.76718	-8.17034
HR615S028	15	HR615S	-6.96077	-2.76718	-9.72795
HR615S029	15	HR615S	-6.28436	-2.76718	-9.05154
HR615S030	15	HR615S	-5.33811	-2.76718	-8.10529
HR615S031	15	HR615S	-4.18718	-2.76718	-6.95436
HR615S032	15	HR615S	0.31021	-2.76718	-2.45697
HR615S033	15	HR615S	3.43621	-2.76718	0.669035
HR615S034	15	HR615S	-7.85891	-2.76718	-10.6261
HR615S035	15	HR615S	-3.29379	-2.76718	-6.06096
HR615S036	15	HR615S	-3.26427	-2.76718	-6.03145
HR615S037	15	HR615S	6.088	-2.76718	3.32082
HR615S038	15	HR615S	-5.71193	-2.76718	-8.47911
HR615S039	15	HR615S	-2.04762	-2.76718	-4.8148
HR615S040	15	HR615S	-2.28845	-2.76718	-5.05563
HR615S041	15	HR615S	4.47898	-2.76718	1.7118
HR615S042	15	HR615S	5.35314	-2.76718	2.58596
HR615S043	15	HR615S	-2.83149	-2.76718	-5.59867
HR615S044	15	HR615S	7.96612	-2.76718	5.19894
HR615S045	15	HR615S	-5.76498	-2.76718	-8.53216
HR615S046	15	HR615S	5.75435	-2.76718	2.98717
HR615S047	15	HR615S	3.00407	-2.76718	0.236896
HR615S049	15	HR615S	-6.3587	-2.76718	-9.12588
HR615S050	15	HR615S	-3.38038	-2.76718	-6.14755
HR615S051	15	HR615S	2.90188	-2.76718	0.134697
HR615S053	15	HR615S	4.43683	-2.76718	1.66965
HR615S054	15	HR615S	-8.33487	-2.76718	-11.1021
HR615S055	15	HR615S	-5.55161	-2.76718	-8.31879
HR615S057	15	HR615S	5.58095	-2.76718	2.81377
HR615S059	15	HR615S	-3.58711	-2.76718	-6.35429
HR615S060	15	HR615S	-4.66036	-2.76718	-7.42753
HR615S061	15	HR615S	4.76894	-2.76718	2.00176
HR615S062	15	HR615S	-8.67557	-2.76718	-11.4427
HR615S063	15	HR615S	-0.477774	-2.76718	-3.24495
HR615S065	15	HR615S	-1.31562	-2.76718	-4.0828
HR615S066	15	HR615S	-3.99542	-2.76718	-6.7626
HR615S067	15	HR615S	5.03637	-2.76718	2.26919
HR615S068	15	HR615S	-4.26644	-2.76718	-7.03361
HR615S070	15	HR615S	3.51239	-2.76718	0.745208
HR615S071	15	HR615S	7.54179	-2.76718	4.77461
HR615S072	15	HR615S	-6.43419	-2.76718	-9.20137
HR615S075	15	HR615S	2.63554	-2.76718	-0.131642
HR615S077	15	HR615S	-4.94409	-2.76718	-7.71127
HR615S078	15	HR615S	-3.76371	-2.76718	-6.53089
HR615S079	15	HR615S	3.67941	-2.76718	0.912232
HR615S080	15	HR615S	10.1726	-2.76718	7.40539
HR616S002	16	HR616S	1.06507	-2.32771	-1.26264
HR616S003	16	HR616S	-1.9656	-2.32771	-4.29331
HR616S004	16	HR616S	-1.4778	-2.32771	-3.80551
HR616S005	16	HR616S	-4.95972	-2.32771	-7.28743
HR616S006	16	HR616S	0.0214853	-2.32771	-2.30622
HR616S007	16	HR616S	-2.14408	-2.32771	-4.47178
HR616S008	16	HR616S	-1.49231	-2.32771	-3.82002
HR616S009	16	HR616S	0.932668	-2.32771	-1.39504
HR616S011	16	HR616S	3.0621	-2.32771	0.734387
HR616S012	16	HR616S	3.56057	-2.32771	1.23286
HR616S013	16	HR616S	-1.11215	-2.32771	-3.43986
HR616S014	16	HR616S	-0.210986	-2.32771	-2.53869
HR616S015	16	HR616S	-5.02454	-2.32771	-7.35225
HR616S016	16	HR616S	2.36762	-2.32771	0.0399082
HR616S017	16	HR616S	2.20228	-2.32771	-0.125433
HR616S018	16	HR616S	3.90007	-2.32771	1.57236
HR616S019	16	HR616S	3.00407	-2.32771	0.67636
HR616S020	16	HR616S	0.0387192	-2.32771	-2.28899
HR616S021	16	HR616S	0.00667657	-2.32771	-2.32103
HR616S022	16	HR616S	0.91315	-2.32771	-1.41456
HR616S024	16	HR616S	-0.0188468	-2.32771	-2.34656
HR616S025	16	HR616S	-0.524584	-2.32771	-2.85229
HR616S026	16	HR616S	0.767066	-2.32771	-1.56064
HR616S028	16	HR616S	1.46474	-2.32771	-0.862972
HR616S029	16	HR616S	0.473086	-2.32771	-1.85462
HR616S030	16	HR616S	-0.635814	-2.32771	-2.96352
HR616S031	16	HR616S	-0.000380889	-2.32771	-2.32809
HR616S032	16	HR616S	0.081404	-2.32771	-2.2463
HR616S033	16	HR616S	3.49568	-2.32771	1.16797
HR616S035	16	HR616S	-3.73952	-2.32771	-6.06723
HR616S036	16	HR616S	-0.990064	-2.32771	-3.31777
HR616S037	16	HR616S	-2.92489	-2.32771	-5.2526
HR616S038	16	HR616S	-0.390579	-2.32771	-2.71829
HR616S039	16	HR616S	-0.364253	-2.32771	-2.69196
HR616S040	16	HR616S	2.35888	-2.32771	0.0311697
HR616S041	16	HR616S	-2.95277	-2.32771	-5.28048
HR616S042	16	HR616S	2.8277	-2.32771	0.499993
HR616S043	16	HR616S	5.90839	-2.32771	3.58068
HR616S044	16	HR616S	-4.63528	-2.32771	-6.96299
HR616S045	16	HR616S	1.94656	-2.32771	-0.381144
HR616S046	16	HR616S	-2.9482	-2.32771	-5.27591
HR616S048	16	HR616S	-0.628843	-2.32771	-2.95655
HR616S050	16	HR616S	-2.4155	-2.32771	-4.7432
HR616S052	16	HR616S	-2.2827	-2.32771	-4.61041
HR616S053	16	HR616S	-1.16411	-2.32771	-3.49181
HR616S054	16	HR616S	-2.86087	-2.32771	-5.18858
HR616S056	16	HR616S	3.1099	-2.32771	0.78219
HR616S057	16	HR616S	1.86465	-2.32771	-0.463056
HR616S058	16	HR616S	0.0696836	-2.32771	-2.25802
HR616S059	16	HR616S	-3.12177	-2.32771	-5.44948
HR616S060	16	HR616S	-3.91801	-2.32771	-6.24572
HR616S061	16	HR616S	2.0749	-2.32771	-0.252804
HR616S062	16	HR616S	-3.77922	-2.32771	-6.10693
HR616S064	16	HR616S	-1.95169	-2.32771	-4.2794
HR616S065	16	HR616S	-3.17873	-2.32771	-5.50644
HR616S066	16	HR616S	-4.40303	-2.32771	-6.73074
HR616S068	16	HR616S	1.04982	-2.32771	-1.27789
HR616S069	16	HR616S	1.60405	-2.32771	-0.723659
HR616S070	16	HR616S	-0.510654	-2.32771	-2.83836
HR616S071	16	HR616S	1.80893	-2.32771	-0.518774
HR616S072	16	HR616S	4.12266	-2.32771	1.79495
HR616S073	16	HR616S	2.39696	-2.32771	0.0692561
HR616S074	16	HR616S	-0.0806203	-2.32771	-2.40833
HR616S075	16	HR616S	2.35618	-2.32771	0.0284709
HR616S076	16	HR616S	-0.605426	-2.32771	-2.93313
HR616S077	16	HR616S	3.03634	-2.32771	0.708636
HR616S078	16	HR616S	4.04542	-2.32771	1.71771
HR616S079	16	HR616S	1.97791	-2.32771	-0.349794
HR616S080	16	HR616S	2.375	-2.32771	0.0472869
HR616S081	16	HR616S	-0.742278	-2.32771	-3.06999
HR616S082	16	HR616S	4.72049	-2.32771	2.39279
HR616S083	16	HR616S	-2.95065	-2.32771	-5.27836
HR616S084	16	HR616S	-0.351919	-2.32771	-2.67963
HR616S085	16	HR616S	-0.736082	-2.32771	-3.06379
HR616S086	16	HR616S	0.596299	-2.32771	-1.73141
HR616S087	16	HR616S	0.182413	-2.32771	-2.1453
HR617S001	17	HR617S	7.19629	0.271958	7.46825
HR617S003	17	HR617S	-0.0826547	0.271958	0.189304
HR617S004	17	HR617S	-1.59484	0.271958	-1.32288
HR617S005	17	HR617S	3.7824	0.271958	4.05436
HR617S006	17	HR617S	4.36052	0.271958	4.63248
HR617S008	17	HR617S	0.399532	0.271958	0.67149
HR617S009	17	HR617S	0.621112	0.271958	0.89307
HR617S010	17	HR617S	2.41442	0.271958	2.68638
HR617S011	17	HR617S	6.07095	0.271958	6.3429
HR617S012	17	HR617S	-0.220862	0.271958	0.0510962
HR617S014	17	HR617S	0.0232061	0.271958	0.295165
HR617S015	17	HR617S	0.0988798	0.271958	0.370838
HR617S016	17	HR617S	2.18759	0.271958	2.45955
HR617S017	17	HR617S	2.84871	0.271958	3.12066
HR617S018	17	HR617S	3.0682	0.271958	3.34016
HR617S019	17	HR617S	-1.22805	0.271958	-0.956087
HR617S020	17	HR617S	-4.07621	0.271958	-3.80425
HR617S021	17	HR617S	1.50745	0.271958	1.77941
HR617S022	17	HR617S	0.419741	0.271958	0.6917
HR617S023	17	HR617S	-0.761041	0.271958	-0.489082
HR617S024	17	HR617S	2.1218	0.271958	2.39376
HR617S025	17	HR617S	1.92776	0.271958	2.19972
HR617S026	17	HR617S	-3.51408	0.271958	-3.24212
HR617S028	17	HR617S	1.05206	0.271958	1.32402
HR617S029	17	HR617S	2.63925	0.271958	2.91121
HR617S030	17	HR617S	-9.07545	0.271958	-8.80349
HR617S031	17	HR617S	-1.37223	0.271958	-1.10027
HR617S032	17	HR617S	-1.84793	0.271958	-1.57597
HR617S033	17	HR617S	-0.841629	0.271958	-0.569671
HR617S034	17	HR617S	1.70327	0.271958	1.97523
HR617S035	17	HR617S	-4.47867	0.271958	-4.20671
HR617S036	17	HR617S	1.29126	0.271958	1.56321
HR617S038	17	HR617S	1.3761	0.271958	1.64806
HR617S039	17	HR617S	-0.111348	0.271958	0.160611
HR617S040	17	HR617S	-3.51672	0.271958	-3.24476
HR617S041	17	HR617S	1.26187	0.271958	1.53382
HR617S042	17	HR617S	2.44344	0.271958	2.7154
HR617S043	17	HR617S	2.39699	0.271958	2.66894
HR617S044	17	HR617S	0.0473914	0.271958	0.31935
HR617S045	17	HR617S	1.14421	0.271958	1.41617
HR617S046	17	HR617S	2.12018	0.271958	2.39214
HR617S047	17	HR617S	4.94798	0.271958	5.21994
HR617S049	17	HR617S	-0.419034	0.271958	-0.147076
HR617S051	17	HR617S	3.09522	0.271958	3.36718
HR617S052	17	HR617S	3.77948	0.271958	4.05144
HR617S053	17	HR617S	-3.38543	0.271958	-3.11347
HR617S054	17	HR617S	0.866642	0.271958	1.1386
HR617S055	17	HR617S	1.01213	0.271958	1.28409
HR617S056	17	HR617S	-1.14275	0.271958	-0.870787
HR617S058	17	HR617S	0.794886	0.271958	1.06684
HR617S059	17	HR617S	2.19146	0.271958	2.46342
HR617S060	17	HR617S	-1.95483	0.271958	-1.68287
HR617S061	17	HR617S	0.886719	0.271958	1.15868
HR617S062	17	HR617S	2.17329	0.271958	2.44525
HR617S063	17	HR617S	-3.64371	0.271958	-3.37175
HR617S065	17	HR617S	0.961703	0.271958	1.23366
HR617S066	17	HR617S	2.50373	0.271958	2.77569
HR617S067	17	HR617S	-3.08855	0.271958	-2.81659
HR617S068	17	HR617S	-2.44514	0.271958	-2.17318
HR617S069	17	HR617S	1.83223	0.271958	2.10419
HR618S001	18	HR618S	-2.87262	-4.65521	-7.52783
HR618S002	18	HR618S	1.40592	-4.65521	-3.24928
HR618S003	18	HR618S	-2.73028	-4.65521	-7.38548
HR618S004	18	HR618S	-5.02261	-4.65521	-9.67781
HR618S005	18	HR618S	-1.42627	-4.65521	-6.08147
HR618S007	18	HR618S	1.97308	-4.65521	-2.68213
HR618S008	18	HR618S	5.06143	-4.65521	0.406226
HR618S009	18	HR618S	1.57961	-4.65521	-3.0756
HR618S010	18	HR618S	1.20383	-4.65521	-3.45138
HR618S011	18	HR618S	0.245695	-4.65521	-4.40951
HR618S012	18	HR618S	2.5023	-4.65521	-2.1529
HR618S013	18	HR618S	4.33993	-4.65521	-0.315275
HR618S014	18	HR618S	3.98957	-4.65521	-0.665633
HR618S016	18	HR618S	0.248963	-4.65521	-4.40624
HR618S017	18	HR618S	-3.01297	-4.65521	-7.66818
HR618S018	18	HR618S	4.64481	-4.65521	-0.0103931
HR618S019	18	HR618S	5.77224	-4.65521	1.11703
HR618S020	18	HR618S	-4.90782	-4.65521	-9.56302
HR618S021	18	HR618S	-5.07715	-4.65521	-9.73236
HR618S022	18	HR618S	-0.387934	-4.65521	-5.04314
HR618S023	18	HR618S	1.70461	-4.65521	-2.9506
HR618S024	18	HR618S	-3.20886	-4.65521	-7.86407
HR618S025	18	HR618S	5.0227	-4.65521	0.367491
HR618S026	18	HR618S	-5.07955	-4.65521	-9.73476
HR618S027	18	HR618S	-2.85892	-4.65521	-7.51413
HR618S028	18	HR618S	4.39758	-4.65521	-0.257632
HR618S029	18	HR618S	-4.51714	-4.65521	-9.17235
HR618S030	18	HR618S	5.39681	-4.65521	0.741599
HR618S031	18	HR618S	1.19361	-4.65521	-3.4616
HR618S032	18	HR618S	-3.46232	-4.65521	-8.11753
HR618S033	18	HR618S	-5.63317	-4.65521	-10.2884
HR618S034	18	HR618S	-4.88153	-4.65521	-9.53674
HR618S035	18	HR618S	-0.517276	-4.65521	-5.17248
HR618S036	18	HR618S	3.13527	-4.65521	-1.51994
HR618S037	18	HR618S	0.283995	-4.65521	-4.37121
HR618S038	18	HR618S	0.720383	-4.65521	-3.93482
HR618S039	18	HR618S	6.17997	-4.65521	1.52476
HR618S040	18	HR618S	-2.71598	-4.65521	-7.37119
HR618S041	18	HR618S	1.02386	-4.65521	-3.63135
HR618S042	18	HR618S	-0.91761	-4.65521	-5.57282
HR618S043	18	HR618S	-6.99394	-4.65521	-11.6491
HR618S044	18	HR618S	4.17122	-4.65521	-0.48399
HR618S045	18	HR618S	1.79594	-4.65521	-2.85927
HR618S046	18	HR618S	1.08773	-4.65521	-3.56748
HR618S047	18	HR618S	-3.81918	-4.65521	-8.47438
HR618S048	18	HR618S	1.61397	-4.65521	-3.04124
HR618S049	18	HR618S	1.50261	-4.65521	-3.1526
HR618S050	18	HR618S	-7.29041	-4.65521	-11.9456
HR618S051	18	HR618S	-3.19302	-4.65521	-7.84823
HR618S053	18	HR618S	2.48663	-4.65521	-2.16857
HR618S054	18	HR618S	3.05877	-4.65521	-1.59644
HR618S055	18	HR618S	5.19946	-4.65521	0.544256
HR618S056	18	HR618S	-0.383018	-4.65521	-5.03822
HR618S057	18	HR618S	3.75241	-4.65521	-0.902796
HR618S058	18	HR618S	2.20267	-4.65521	-2.45254
HR618S059	18	HR618S	-6.04948	-4.65521	-10.7047
HR618S060	18	HR618S	-3.88486	-4.65521	-8.54006
HR618S061	18	HR618S	-4.23142	-4.65521	-8.88662
HR618S062	18	HR618S	-2.01954	-4.65521	-6.67475
HR618S063	18	HR618S	2.02967	-4.65521	-2.62554
HR618S065	18	HR618S	-5.57632	-4.65521	-10.2315
HR618S066	18	HR618S	2.70512	-4.65521	-1.95009
HR618S067	18	HR618S	5.63437	-4.65521	0.979167
HR618S068	18	HR618S	-4.18817	-4.65521	-8.84337
HR618S070	18	HR618S	-5.24441	-4.65521	-9.89961
HR618S072	18	HR618S	0.554208	-4.65521	-4.101
HR618S073	18	HR618S	-3.57161	-4.65521	-8.22682
HR618S079	18	HR618S	2.26014	-4.65521	-2.39507
HR618S080	18	HR618S	-1.40705	-4.65521	-6.06226
HR618S081	18	HR618S	6.93548	-4.65521	2.28027
HR620S001	20	HR620S	1.59189	-1.59773	-0.0058445
HR620S002	20	HR620S	-2.56146	-1.59773	-4.15919
HR620S003	20	HR620S	0.696304	-1.59773	-0.901426
HR620S004	20	HR620S	3.24379	-1.59773	1.64606
HR620S005	20	HR620S	1.5518	-1.59773	-0.0459323
HR620S006	20	HR620S	-2.26062	-1.59773	-3.85835
HR620S007	20	HR620S	-0.682031	-1.59773	-2.27976
HR620S008	20	HR620S	0.961719	-1.59773	-0.636011
HR620S009	20	HR620S	4.02362	-1.59773	2.42589
HR620S010	20	HR620S	3.36121	-1.59773	1.76348
HR620S011	20	HR620S	5.25012	-1.59773	3.65239
HR620S012	20	HR620S	4.64701	-1.59773	3.04928
HR620S013	20	HR620S	-2.95236	-1.59773	-4.55009
HR620S015	20	HR620S	-1.87732	-1.59773	-3.47506
HR620S016	20	HR620S	-4.93311	-1.59773	-6.53084
HR620S017	20	HR620S	0.633577	-1.59773	-0.964153
HR620S018	20	HR620S	0.543026	-1.59773	-1.0547
HR620S019	20	HR620S	4.9713	-1.59773	3.37357
HR620S020	20	HR620S	-0.434053	-1.59773	-2.03178
HR620S021	20	HR620S	1.23362	-1.59773	-0.364109
HR620S022	20	HR620S	-1.07227	-1.59773	-2.67
HR620S023	20	HR620S	4.93592	-1.59773	3.33819
HR620S024	20	HR620S	-2.68864	-1.59773	-4.28637
HR620S025	20	HR620S	-1.20581	-1.59773	-2.80354
HR620S026	20	HR620S	4.77979	-1.59773	3.18206
HR620S028	20	HR620S	2.83164	-1.59773	1.23391
HR620S029	20	HR620S	4.34915	-1.59773	2.75142
HR620S031	20	HR620S	-1.99511	-1.59773	-3.59284
HR620S033	20	HR620S	-0.88087	-1.59773	-2.4786
HR620S034	20	HR620S	-3.2678	-1.59773	-4.86553
HR620S035	20	HR620S	-0.475921	-1.59773	-2.07365
HR620S038	20	HR620S	5.88118	-1.59773	4.28345
HR620S039	20	HR620S	4.23819	-1.59773	2.64046
HR620S040	20	HR620S	-4.25415	-1.59773	-5.85188
HR620S041	20	HR620S	-1.11833	-1.59773	-2.71606
HR620S042	20	HR620S	-3.36983	-1.59773	-4.96756
HR620S043	20	HR620S	-1.0483	-1.59773	-2.64603
HR620S044	20	HR620S	-3.52745	-1.59773	-5.12518
HR620S045	20	HR620S	3.41625	-1.59773	1.81852
HR620S046	20	HR620S	1.80909	-1.59773	0.211357
HR620S048	20	HR620S	-3.56604	-1.59773	-5.16377
HR620S049	20	HR620S	-1.01935	-1.59773	-2.61709
HR620S050	20	HR620S	1.79883	-1.59773	0.201103
HR620S051	20	HR620S	2.96875	-1.59773	1.37102
HR620S052	20	HR620S	-2.48007	-1.59773	-4.0778
HR620S053	20	HR620S	5.02092	-1.59773	3.42319
HR620S054	20	HR620S	3.25696	-1.59773	1.65923
HR620S055	20	HR620S	-3.83667	-1.59773	-5.4344
HR620S056	20	HR620S	-3.37551	-1.59773	-4.97324
HR620S057	20	HR620S	-3.26707	-1.59773	-4.86481
HR620S058	20	HR620S	2.30437	-1.59773	0.706643
HR620S060	20	HR620S	-2.29753	-1.59773	-3.89526
HR620S061	20	HR620S	4.34714	-1.59773	2.74941
HR620S062	20	HR620S	-2.26839	-1.59773	-3.86612
HR620S064	20	HR620S	4.68986	-1.59773	3.09213
HR620S065	20	HR620S	-4.37206	-1.59773	-5.96979
HR620S066	20	HR620S	-2.44371	-1.59773	-4.04144
HR620S067	20	HR620S	-4.45926	-1.59773	-6.057
HR620S068	20	HR620S	-2.85676	-1.59773	-4.45449
HR620S069	20	HR620S	-2.52738	-1.59773	-4.12512
HR620S070	20	HR620S	2.84574	-1.59773	1.24801
HR620S071	20	HR620S	-0.313324	-1.59773	-1.91105
HR620S073	20	HR620S	3.60599	-1.59773	2.00826
HR620S074	20	HR620S	-2.47296	-1.59773	-4.07069
HR620S075	20	HR620S	-4.85285	-1.59773	-6.45058
HR620S076	20	HR620S	2.86819	-1.59773	1.27046
HR620S078	20	HR620S	5.10923	-1.59773	3.5115
HR621S001	21	HR621S	-3.58961	-4.41199	-8.0016
HR621S002	21	HR621S	-2.17957	-4.41199	-6.59156
HR621S003	21	HR621S	-4.20436	-4.41199	-8.61635
HR621S004	21	HR621S	-4.03183	-4.41199	-8.44382
HR621S006	21	HR621S	-2.7947	-4.41199	-7.20669
HR621S007	21	HR621S	-1.17349	-4.41199	-5.58548
HR621S008	21	HR621S	5.31283	-4.41199	0.90084
HR621S009	21	HR621S	-4.16872	-4.41199	-8.58072
HR621S010	21	HR621S	-4.35454	-4.41199	-8.76653
HR621S012	21	HR621S	-4.39032	-4.41199	-8.80231
HR621S013	21	HR621S	-3.96557	-4.41199	-8.37756
HR621S015	21	HR621S	-0.800325	-4.41199	-5.21232
HR621S016	21	HR621S	4.2329	-4.41199	-0.179091
HR621S017	21	HR621S	-3.57679	-4.41199	-7.98878
HR621S018	21	HR621S	-2.90637	-4.41199	-7.31836
HR621S019	21	HR621S	8.32256	-4.41199	3.91056
HR621S020	21	HR621S	-2.75394	-4.41199	-7.16593
HR621S021	21	HR621S	5.9721	-4.41199	1.56011
HR621S022	21	HR621S	1.18026	-4.41199	-3.23173
HR621S025	21	HR621S	3.62527	-4.41199	-0.786726
HR621S026	21	HR621S	-6.45568	-4.41199	-10.8677
HR621S027	21	HR621S	-2.09416	-4.41199	-6.50615
HR621S028	21	HR621S	0.711271	-4.41199	-3.70072
HR621S029	21	HR621S	-0.128467	-4.41199	-4.54046
HR621S030	21	HR621S	0.732313	-4.41199	-3.67968
HR621S031	21	HR621S	4.5019	-4.41199	0.0899092
HR621S032	21	HR621S	-4.95746	-4.41199	-9.36945
HR621S033	21	HR621S	0.236464	-4.41199	-4.17553
HR621S034	21	HR621S	-3.46428	-4.41199	-7.87627
HR621S035	21	HR621S	-3.61178	-4.41199	-8.02377
HR621S037	21	HR621S	7.26105	-4.41199	2.84905
HR621S038	21	HR621S	-2.6444	-4.41199	-7.0564
HR621S039	21	HR621S	-1.00476	-4.41199	-5.41675
HR621S040	21	HR621S	-4.18723	-4.41199	-8.59922
HR621S041	21	HR621S	-2.86955	-4.41199	-7.28155
HR621S042	21	HR621S	-2.94531	-4.41199	-7.3573
HR621S043	21	HR621S	-0.119449	-4.41199	-4.53144
HR621S044	21	HR621S	-4.43954	-4.41199	-8.85154
HR621S045	21	HR621S	1.21775	-4.41199	-3.19424
HR621S046	21	HR621S	5.25814	-4.41199	0.846144
HR621S047	21	HR621S	-3.13638	-4.41199	-7.54837
HR621S048	21	HR621S	6.10214	-4.41199	1.69015
HR621S049	21	HR621S	4.64919	-4.41199	0.237193
HR621S050	21	HR621S	4.53998	-4.41199	0.127985
HR621S051	21	HR621S	6.61675	-4.41199	2.20476
HR621S053	21	HR621S	1.48363	-4.41199	-2.92836
HR621S054	21	HR621S	0.904104	-4.41199	-3.50789
HR621S056	21	HR621S	3.54877	-4.41199	-0.863222
HR621S057	21	HR621S	6.69694	-4.41199	2.28495
HR621S058	21	HR621S	1.03654	-4.41199	-3.37546
HR621S059	21	HR621S	-0.905515	-4.41199	-5.31751
HR621S060	21	HR621S	5.05999	-4.41199	0.647995
HR622S001	22	HR622S	1.58109	-3.92785	-2.34676
HR622S002	22	HR622S	5.85356	-3.92785	1.9257
HR622S003	22	HR622S	-5.01878	-3.92785	-8.94663
HR622S004	22	HR622S	-2.50801	-3.92785	-6.43587
HR622S005	22	HR622S	-5.30551	-3.92785	-9.23336
HR622S006	22	HR622S	4.54072	-3.92785	0.612864
HR622S007	22	HR622S	4.56837	-3.92785	0.640516
HR622S008	22	HR622S	2.39899	-3.92785	-1.52886
HR622S009	22	HR622S	-2.85391	-3.92785	-6.78176
HR622S010	22	HR622S	1.06796	-3.92785	-2.8599
HR622S011	22	HR622S	2.4481	-3.92785	-1.47976
HR622S012	22	HR622S	-5.37075	-3.92785	-9.2986
HR622S013	22	HR622S	5.16394	-3.92785	1.23609
HR622S014	22	HR622S	-4.4022	-3.92785	-8.33005
HR622S015	22	HR622S	-0.313799	-3.92785	-4.24165
HR622S016	22	HR622S	-2.78944	-3.92785	-6.71729
HR622S017	22	HR622S	-3.62513	-3.92785	-7.55298
HR622S018	22	HR622S	-3.76292	-3.92785	-7.69077
HR622S019	22	HR622S	4.91535	-3.92785	0.987494
HR622S020	22	HR622S	-4.27587	-3.92785	-8.20372
HR622S021	22	HR622S	-1.97772	-3.92785	-5.90557
HR622S022	22	HR622S	-6.19259	-3.92785	-10.1204
HR622S023	22	HR622S	-3.21518	-3.92785	-7.14303
HR622S024	22	HR622S	3.54859	-3.92785	-0.379259
HR622S025	22	HR622S	-4.30382	-3.92785	-8.23167
HR622S026	22	HR622S	4.08264	-3.92785	0.154789
HR622S027	22	HR622S	-3.99865	-3.92785	-7.92651
HR622S028	22	HR622S	4.46458	-3.92785	0.536731
HR622S029	22	HR622S	4.76786	-3.92785	0.840003
HR622S031	22	HR622S	-5.15535	-3.92785	-9.0832
HR622S032	22	HR622S	4.17268	-3.92785	0.244825
HR622S033	22	HR622S	-1.671	-3.92785	-5.59885
HR622S034	22	HR622S	0.446713	-3.92785	-3.48114
HR622S036	22	HR622S	0.196514	-3.92785	-3.73134
HR622S037	22	HR622S	4.66713	-3.92785	0.739279
HR622S038	22	HR622S	-0.990102	-3.92785	-4.91795
HR622S039	22	HR622S	-2.75837	-3.92785	-6.68622
HR622S040	22	HR622S	0.972461	-3.92785	-2.95539
HR622S041	22	HR622S	-1.16936	-3.92785	-5.09722
HR622S042	22	HR622S	-4.15158	-3.92785	-8.07944
HR622S043	22	HR622S	1.84011	-3.92785	-2.08774
HR622S044	22	HR622S	2.99269	-3.92785	-0.93516
HR622S045	22	HR622S	1.69826	-3.92785	-2.22959
HR622S046	22	HR622S	7.99097	-3.92785	4.06312
HR622S047	22	HR622S	-5.71511	-3.92785	-9.64296
HR622S048	22	HR622S	1.4641	-3.92785	-2.46375
HR622S049	22	HR622S	1.45001	-3.92785	-2.47784
HR622S050	22	HR622S	4.18191	-3.92785	0.254058
HR622S051	22	HR622S	-3.17125	-3.92785	-7.0991
HR622S052	22	HR622S	-2.0589	-3.92785	-5.98675
HR622S053	22	HR622S	-6.74476	-3.92785	-10.6726
HR622S054	22	HR622S	5.7923	-3.92785	1.86444
HR622S055	22	HR622S	3.28395	-3.92785	-0.643906
HR622S056	22	HR622S	-4.20835	-3.92785	-8.13621
HR622S057	22	HR622S	-4.61061	-3.92785	-8.53846
HR622S058	22	HR622S	-4.01738	-3.92785	-7.94524
HR622S060	22	HR622S	4.41229	-3.92785	0.484438
HR622S061	22	HR622S	3.99419	-3.92785	0.0663401
HR623S002	23	HR623S	4.07514	-3.79903	0.276105
HR623S003	23	HR623S	2.97922	-3.79903	-0.81981
HR623S004	23	HR623S	-6.05506	-3.79903	-9.85409
HR623S005	23	HR623S	3.62639	-3.79903	-0.172642
HR623S008	23	HR623S	3.2422	-3.79903	-0.556829
HR623S010	23	HR623S	-5.99187	-3.79903	-9.7909
HR623S012	23	HR623S	6.31929	-3.79903	2.52026
HR623S013	23	HR623S	5.23055	-3.79903	1.43152
HR623S014	23	HR623S	6.93037	-3.79903	3.13134
HR623S015	23	HR623S	-2.70025	-3.79903	-6.49928
HR623S016	23	HR623S	-5.20614	-3.79903	-9.00517
HR623S018	23	HR623S	6.06569	-3.79903	2.26666
HR623S019	23	HR623S	0.172255	-3.79903	-3.62678
HR623S020	23	HR623S	4.1597	-3.79903	0.360665
HR623S021	23	HR623S	3.51345	-3.79903	-0.285581
HR623S022	23	HR623S	-1.02499	-3.79903	-4.82402
HR623S023	23	HR623S	-0.372058	-3.79903	-4.17109
HR623S024	23	HR623S	4.60166	-3.79903	0.802632
HR623S025	23	HR623S	4.66195	-3.79903	0.862919
HR623S026	23	HR623S	-7.25368	-3.79903	-11.0527
HR623S027	23	HR623S	-0.845783	-3.79903	-4.64481
HR623S028	23	HR623S	-0.63613	-3.79903	-4.43516
HR623S031	23	HR623S	4.30736	-3.79903	0.508326
HR623S032	23	HR623S	1.64764	-3.79903	-2.1514
HR623S033	23	HR623S	-0.38848	-3.79903	-4.18751
HR623S034	23	HR623S	-2.28928	-3.79903	-6.08831
HR623S035	23	HR623S	-4.4124	-3.79903	-8.21143
HR623S038	23	HR623S	-4.29696	-3.79903	-8.09599
HR623S039	23	HR623S	2.9458	-3.79903	-0.853227
HR623S040	23	HR623S	7.56063	-3.79903	3.7616
HR623S041	23	HR623S	-1.39096	-3.79903	-5.18999
HR623S042	23	HR623S	-3.08606	-3.79903	-6.88509
HR623S043	23	HR623S	0.551888	-3.79903	-3.24714
HR623S044	23	HR623S	7.50883	-3.79903	3.7098
HR623S045	23	HR623S	1.36685	-3.79903	-2.43218
HR623S046	23	HR623S	-5.16714	-3.79903	-8.96617
HR623S048	23	HR623S	-2.04387	-3.79903	-5.8429
HR623S049	23	HR623S	-4.60569	-3.79903	-8.40472
HR623S050	23	HR623S	-2.60796	-3.79903	-6.407
HR623S052	23	HR623S	3.1252	-3.79903	-0.673834
HR623S053	23	HR623S	-6.56637	-3.79903	-10.3654
HR624S001	24	HR624S	-4.39415	-3.79613	-8.19028
HR624S002	24	HR624S	2.11511	-3.79613	-1.68101
HR624S003	24	HR624S	-2.53366	-3.79613	-6.32979
HR624S004	24	HR624S	0.0980218	-3.79613	-3.6981
HR624S005	24	HR624S	2.46143	-3.79613	-1.33469
HR624S006	24	HR624S	-0.153796	-3.79613	-3.94992
HR624S007	24	HR624S	1.55534	-3.79613	-2.24078
HR624S008	24	HR624S	-2.42447	-3.79613	-6.2206
HR624S009	24	HR624S	-2.20324	-3.79613	-5.99937
HR624S010	24	HR624S	2.14522	-3.79613	-1.65091
HR624S011	24	HR624S	4.54126	-3.79613	0.745133
HR624S012	24	HR624S	-1.33278	-3.79613	-5.12891
HR624S013	24	HR624S	2.40129	-3.79613	-1.39483
HR624S014	24	HR624S	-4.00463	-3.79613	-7.80075
HR624S015	24	HR624S	-3.66114	-3.79613	-7.45727
HR624S017	24	HR624S	-0.73026	-3.79613	-4.52639
HR624S018	24	HR624S	0.808766	-3.79613	-2.98736
HR624S019	24	HR624S	-0.557085	-3.79613	-4.35321
HR624S020	24	HR624S	2.76884	-3.79613	-1.02728
HR624S021	24	HR624S	0.804268	-3.79613	-2.99186
HR624S022	24	HR624S	-2.90701	-3.79613	-6.70313
HR624S024	24	HR624S	0.394602	-3.79613	-3.40152
HR624S025	24	HR624S	-7.65464	-3.79613	-11.4508
HR624S026	24	HR624S	0.229484	-3.79613	-3.56664
HR624S027	24	HR624S	-0.300826	-3.79613	-4.09695
HR624S028	24	HR624S	4.74162	-3.79613	0.945489
HR624S029	24	HR624S	1.93007	-3.79613	-1.86605
HR624S030	24	HR624S	-3.23264	-3.79613	-7.02877
HR624S031	24	HR624S	0.455649	-3.79613	-3.34048
HR624S032	24	HR624S	-5.12429	-3.79613	-8.92041
HR624S033	24	HR624S	-0.556552	-3.79613	-4.35268
HR624S034	24	HR624S	1.53753	-3.79613	-2.2586
HR624S035	24	HR624S	3.38002	-3.79613	-0.416111
HR624S037	24	HR624S	-3.25964	-3.79613	-7.05577
HR624S038	24	HR624S	-4.52289	-3.79613	-8.31901
HR624S039	24	HR624S	2.23229	-3.79613	-1.56384
HR624S040	24	HR624S	-2.10643	-3.79613	-5.90256
HR624S041	24	HR624S	1.86822	-3.79613	-1.92791
HR624S042	24	HR624S	0.176902	-3.79613	-3.61922
HR624S043	24	HR624S	1.94204	-3.79613	-1.85409
HR624S045	24	HR624S	2.1781	-3.79613	-1.61802
HR624S046	24	HR624S	-2.48963	-3.79613	-6.28576
HR624S047	24	HR624S	-2.35703	-3.79613	-6.15316
HR624S048	24	HR624S	2.61811	-3.79613	-1.17802
HR624S049	24	HR624S	-3.22803	-3.79613	-7.02416
HR624S050	24	HR624S	-0.106102	-3.79613	-3.90223
HR624S051	24	HR624S	-2.1268	-3.79613	-5.92293
HR624S052	24	HR624S	-3.1582	-3.79613	-6.95433
HR624S053	24	HR624S	1.80452	-3.79613	-1.9916
HR624S054	24	HR624S	-3.09175	-3.79613	-6.88788
HR624S056	24	HR624S	-3.42483	-3.79613	-7.22096
HR624S057	24	HR624S	3.47667	-3.79613	-0.319452
HR624S058	24	HR624S	3.42529	-3.79613	-0.37084
HR624S059	24	HR624S	8.70992	-3.79613	4.91379
HR624S060	24	HR624S	4.51831	-3.79613	0.722182
HR624S061	24	HR624S	-0.646064	-3.79613	-4.44219
HR624S062	24	HR624S	1.64646	-3.79613	-2.14966
HR624S063	24	HR624S	0.491692	-3.79613	-3.30443
HR624S064	24	HR624S	2.69585	-3.79613	-1.10028
HR624S065	24	HR624S	-2.21282	-3.79613	-6.00895
HR624S066	24	HR624S	-2.87352	-3.79613	-6.66964
HR624S067	24	HR624S	-0.325398	-3.79613	-4.12152
HR625S001	25	HR625S	-1.8224	-1.67252	-3.49492
HR625S002	25	HR625S	1.51465	-1.67252	-0.157868
HR625S003	25	HR625S	-2.08381	-1.67252	-3.75633
HR625S004	25	HR625S	1.22005	-1.67252	-0.452468
HR625S005	25	HR625S	0.65003	-1.67252	-1.02249
HR625S006	25	HR625S	2.73103	-1.67252	1.05851
HR625S007	25	HR625S	2.33813	-1.67252	0.665607
HR625S008	25	HR625S	0.885572	-1.67252	-0.786949
HR625S010	25	HR625S	-0.460044	-1.67252	-2.13256
HR625S011	25	HR625S	-1.75583	-1.67252	-3.42835
HR625S012	25	HR625S	5.08524	-1.67252	3.41272
HR625S013	25	HR625S	1.5795	-1.67252	-0.093024
HR625S014	25	HR625S	0.165544	-1.67252	-1.50698
HR625S015	25	HR625S	-1.75432	-1.67252	-3.42684
HR625S016	25	HR625S	2.72303	-1.67252	1.05051
HR625S018	25	HR625S	-0.549818	-1.67252	-2.22234
HR625S019	25	HR625S	-2.18375	-1.67252	-3.85627
HR625S020	25	HR625S	0.407337	-1.67252	-1.26518
HR625S021	25	HR625S	-1.00146	-1.67252	-2.67398
HR625S022	25	HR625S	-0.83215	-1.67252	-2.50467
HR625S024	25	HR625S	-0.185843	-1.67252	-1.85836
HR625S025	25	HR625S	-0.823083	-1.67252	-2.4956
HR625S026	25	HR625S	-1.32649	-1.67252	-2.99901
HR625S027	25	HR625S	-3.32037	-1.67252	-4.99289
HR625S028	25	HR625S	5.16757	-1.67252	3.49505
HR625S029	25	HR625S	-0.580674	-1.67252	-2.25319
HR625S030	25	HR625S	-1.9694	-1.67252	-3.64192
HR625S031	25	HR625S	1.9713	-1.67252	0.298775
HR625S032	25	HR625S	0.254023	-1.67252	-1.4185
HR625S033	25	HR625S	-1.32712	-1.67252	-2.99964
HR625S034	25	HR625S	0.670648	-1.67252	-1.00187
HR625S035	25	HR625S	-1.0524	-1.67252	-2.72492
HR625S036	25	HR625S	-2.57337	-1.67252	-4.24589
HR625S037	25	HR625S	-1.34183	-1.67252	-3.01435
HR626S001	26	HR626S	5.08254	-4.99649	0.0860501
HR626S002	26	HR626S	-0.221829	-4.99649	-5.21832
HR626S004	26	HR626S	6.19944	-4.99649	1.20295
HR626S005	26	HR626S	6.09452	-4.99649	1.09803
HR626S006	26	HR626S	-3.39802	-4.99649	-8.39451
HR626S007	26	HR626S	-3.36655	-4.99649	-8.36304
HR626S008	26	HR626S	-1.38639	-4.99649	-6.38288
HR626S009	26	HR626S	5.80582	-4.99649	0.809332
HR626S010	26	HR626S	-2.00405	-4.99649	-7.00054
HR626S012	26	HR626S	-3.12186	-4.99649	-8.11835
HR626S013	26	HR626S	2.39794	-4.99649	-2.59855
HR626S014	26	HR626S	0.66944	-4.99649	-4.32705
HR626S015	26	HR626S	5.32399	-4.99649	0.327504
HR626S016	26	HR626S	7.43376	-4.99649	2.43727
HR626S018	26	HR626S	-1.08485	-4.99649	-6.08134
HR626S019	26	HR626S	-3.18914	-4.99649	-8.18563
HR626S020	26	HR626S	-4.91936	-4.99649	-9.91585
HR626S021	26	HR626S	2.30905	-4.99649	-2.68744
HR626S022	26	HR626S	-2.28389	-4.99649	-7.28038
HR626S024	26	HR626S	-3.83652	-4.99649	-8.83301
HR626S025	26	HR626S	-2.86412	-4.99649	-7.8606
HR626S026	26	HR626S	-4.77974	-4.99649	-9.77623
HR626S027	26	HR626S	4.0246	-4.99649	-0.971891
HR626S028	26	HR626S	-4.56971	-4.99649	-9.5662
HR626S029	26	HR626S	1.27675	-4.99649	-3.71974
HR626S030	26	HR626S	2.35084	-4.99649	-2.64565
HR626S031	26	HR626S	-3.53494	-4.99649	-8.53143
HR626S032	26	HR626S	2.6144	-4.99649	-2.38209
HR626S033	26	HR626S	-2.94597	-4.99649	-7.94246
HR626S034	26	HR626S	3.67881	-4.99649	-1.31768
HR626S035	26	HR626S	-4.30996	-4.99649	-9.30645
HR626S036	26	HR626S	6.56757	-4.99649	1.57108
HR626S037	26	HR626S	-3.11311	-4.99649	-8.1096
HR626S038	26	HR626S	-3.1696	-4.99649	-8.16609
HR626S039	26	HR626S	5.88807	-4.99649	0.891581
HR626S040	26	HR626S	-4.2086	-4.99649	-9.20509
HR626S041	26	HR626S	-3.92122	-4.99649	-8.91771
HR626S042	26	HR626S	-3.55153	-4.99649	-8.54802
HR626S043	26	HR626S	-3.86875	-4.99649	-8.86524
HR626S044	26	HR626S	-4.28334	-4.99649	-9.27983
HR626S046	26	HR626S	1.9448	-4.99649	-3.05169
HR626S048	26	HR626S	7.72479	-4.99649	2.7283
HR626S049	26	HR626S	-2.11397	-4.99649	-7.11046
HR626S050	26	HR626S	1.82748	-4.99649	-3.16901
HR626S051	26	HR626S	-5.20298	-4.99649	-10.1995
HR626S052	26	HR626S	4.6345	-4.99649	-0.36199
HR626S053	26	HR626S	-1.50948	-4.99649	-6.50597
HR626S054	26	HR626S	-2.36788	-4.99649	-7.36437
HR626S055	26	HR626S	-4.73638	-4.99649	-9.73287
HR626S056	26	HR626S	-4.02914	-4.99649	-9.02563
HR627S001	27	HR627S	3.35985	-1.28443	2.07542
HR627S002	27	HR627S	-3.61277	-1.28443	-4.8972
HR627S003	27	HR627S	1.57112	-1.28443	0.286696
HR627S004	27	HR627S	3.75593	-1.28443	2.47151
HR627S005	27	HR627S	2.0119	-1.28443	0.72747
HR627S006	27	HR627S	1.75247	-1.28443	0.468044
HR627S007	27	HR627S	0.265294	-1.28443	-1.01913
HR627S008	27	HR627S	-0.85986	-1.28443	-2.14429
HR627S009	27	HR627S	-0.896188	-1.28443	-2.18061
HR627S010	27	HR627S	-1.58481	-1.28443	-2.86923
HR627S011	27	HR627S	-0.00422857	-1.28443	-1.28865
HR627S012	27	HR627S	-0.653556	-1.28443	-1.93798
HR627S013	27	HR627S	1.54375	-1.28443	0.259328
HR627S014	27	HR627S	-3.73745	-1.28443	-5.02187
HR627S015	27	HR627S	1.43315	-1.28443	0.148721
HR627S016	27	HR627S	3.79737	-1.28443	2.51295
HR627S017	27	HR627S	-1.18857	-1.28443	-2.47299
HR627S018	27	HR627S	4.52765	-1.28443	3.24322
HR627S019	27	HR627S	-3.60304	-1.28443	-4.88747
HR627S020	27	HR627S	-1.27577	-1.28443	-2.5602
HR627S021	27	HR627S	1.57411	-1.28443	0.28968
HR627S022	27	HR627S	-0.125378	-1.28443	-1.4098
HR627S023	27	HR627S	-1.7724	-1.28443	-3.05683
HR627S024	27	HR627S	0.862174	-1.28443	-0.422251
HR627S025	27	HR627S	-2.09659	-1.28443	-3.38101
HR627S026	27	HR627S	2.40914	-1.28443	1.12472
HR627S027	27	HR627S	2.86318	-1.28443	1.57876
HR627S028	27	HR627S	1.02214	-1.28443	-0.262287
HR627S029	27	HR627S	3.30773	-1.28443	2.0233
HR627S030	27	HR627S	-1.34322	-1.28443	-2.62765
HR627S031	27	HR627S	0.205236	-1.28443	-1.07919
HR627S032	27	HR627S	0.24269	-1.28443	-1.04174
HR627S033	27	HR627S	-0.0599847	-1.28443	-1.34441
HR627S034	27	HR627S	-0.317858	-1.28443	-1.60228
HR627S035	27	HR627S	3.70083	-1.28443	2.41641
HR627S036	27	HR627S	1.58675	-1.28443	0.302326
HR627S037	27	HR627S	-2.80903	-1.28443	-4.09346
HR627S038	27	HR627S	-0.0950735	-1.28443	-1.3795
HR627S039	27	HR627S	2.84815	-1.28443	1.56372
HR627S040	27	HR627S	-3.07909	-1.28443	-4.36351
HR627S041	27	HR627S	-0.886579	-1.28443	-2.171
HR627S042	27	HR627S	-1.9789	-1.28443	-3.26332
HR627S043	27	HR627S	-3.98915	-1.28443	-5.27357
HR627S044	27	HR627S	-0.826108	-1.28443	-2.11053
HR627S045	27	HR627S	3.25385	-1.28443	1.96943
HR627S046	27	HR627S	-1.60371	-1.28443	-2.88814
HR627S047	27	HR627S	2.81462	-1.28443	1.53019
HR627S048	27	HR627S	0.316994	-1.28443	-0.967431
HR627S049	27	HR627S	-3.36581	-1.28443	-4.65023
HR627S050	27	HR627S	1.71137	-1.28443	0.426942
HR627S051	27	HR627S	-1.68532	-1.28443	-2.96975
HR627S052	27	HR627S	-1.02409	-1.28443	-2.30852
HR627S053	27	HR627S	5.31915	-1.28443	4.03472
HR627S054	27	HR627S	-0.143061	-1.28443	-1.42749
HR627S055	27	HR627S	1.76994	-1.28443	0.485512
HR627S056	27	HR627S	-2.59766	-1.28443	-3.88208
HR627S057	27	HR627S	-5.61669	-1.28443	-6.90111
HR627S058	27	HR627S	4.09618	-1.28443	2.81175
HR627S059	27	HR627S	-1.80463	-1.28443	-3.08905
HR628S001	28	HR628S	-2.70512	-3.54955	-6.25467
HR628S002	28	HR628S	-0.11403	-3.54955	-3.66358
HR628S003	28	HR628S	6.13129	-3.54955	2.58174
HR628S004	28	HR628S	-3.89063	-3.54955	-7.44018
HR628S005	28	HR628S	3.39144	-3.54955	-0.158103
HR628S006	28	HR628S	-4.30991	-3.54955	-7.85945
HR628S007	28	HR628S	-4.44245	-3.54955	-7.992
HR628S008	28	HR628S	1.24445	-3.54955	-2.30509
HR628S009	28	HR628S	0.878472	-3.54955	-2.67107
HR628S010	28	HR628S	6.50102	-3.54955	2.95147
HR628S011	28	HR628S	-0.370308	-3.54955	-3.91986
HR628S012	28	HR628S	-4.02696	-3.54955	-7.57651
HR628S013	28	HR628S	5.51881	-3.54955	1.96926
HR628S014	28	HR628S	-5.8633	-3.54955	-9.41284
HR628S015	28	HR628S	4.12033	-3.54955	0.570786
HR628S016	28	HR628S	-7.70727	-3.54955	-11.2568
HR628S017	28	HR628S	5.01454	-3.54955	1.46499
HR628S018	28	HR628S	0.312061	-3.54955	-3.23749
HR628S019	28	HR628S	7.33714	-3.54955	3.78759
HR628S020	28	HR628S	7.04493	-3.54955	3.49538
HR628S021	28	HR628S	-0.73952	-3.54955	-4.28907
HR628S022	28	HR628S	-2.80373	-3.54955	-6.35328
HR628S023	28	HR628S	-0.943723	-3.54955	-4.49327
HR628S024	28	HR628S	-3.14702	-3.54955	-6.69656
HR628S025	28	HR628S	-6.16007	-3.54955	-9.70961
HR628S026	28	HR628S	1.49483	-3.54955	-2.05471
HR628S027	28	HR628S	4.14073	-3.54955	0.59118
HR628S028	28	HR628S	-4.04471	-3.54955	-7.59426
HR628S030	28	HR628S	-5.02146	-3.54955	-8.57101
HR628S031	28	HR628S	-4.08065	-3.54955	-7.6302
HR628S032	28	HR628S	5.7402	-3.54955	2.19065
HR628S033	28	HR628S	6.67185	-3.54955	3.1223
HR628S034	28	HR628S	-0.365709	-3.54955	-3.91526
HR628S035	28	HR628S	6.72836	-3.54955	3.17882
HR628S036	28	HR628S	3.77245	-3.54955	0.222906
HR628S037	28	HR628S	-2.04336	-3.54955	-5.5929
HR628S038	28	HR628S	0.621221	-3.54955	-2.92833
HR628S040	28	HR628S	-3.79835	-3.54955	-7.3479
HR628S041	28	HR628S	-4.22007	-3.54955	-7.76961
HR628S042	28	HR628S	-3.55555	-3.54955	-7.1051
HR628S043	28	HR628S	-6.54854	-3.54955	-10.0981
HR628S044	28	HR628S	7.07343	-3.54955	3.52389
HR628S045	28	HR628S	0.0612332	-3.54955	-3.48831
HR628S046	28	HR628S	1.56103	-3.54955	-1.98852
HR628S048	28	HR628S	-3.55438	-3.54955	-7.10393
HR628S049	28	HR628S	-2.8585	-3.54955	-6.40804
HR628S050	28	HR628S	-2.93393	-3.54955	-6.48348
HR628S052	28	HR628S	-1.365	-3.54955	-4.91454
HR628S053	28	HR628S	3.22293	-3.54955	-0.326617
HR628S054	28	HR628S	-2.80625	-3.54955	-6.3558
HR628S055	28	HR628S	-3.89044	-3.54955	-7.43999
HR629S001	29	HR629S	-0.0656545	-2.14009	-2.20574
HR629S002	29	HR629S	0.249006	-2.14009	-1.89108
HR629S003	29	HR629S	-1.10078	-2.14009	-3.24087
HR629S004	29	HR629S	-0.364484	-2.14009	-2.50457
HR629S005	29	HR629S	-0.242647	-2.14009	-2.38273
HR629S006	29	HR629S	1.55347	-2.14009	-0.586621
HR629S007	29	HR629S	4.93452	-2.14009	2.79443
HR629S009	29	HR629S	1.03866	-2.14009	-1.10143
HR629S010	29	HR629S	-2.00169	-2.14009	-4.14177
HR629S011	29	HR629S	1.57379	-2.14009	-0.566294
HR629S012	29	HR629S	-1.01206	-2.14009	-3.15215
HR629S013	29	HR629S	0.806042	-2.14009	-1.33404
HR629S014	29	HR629S	-0.788043	-2.14009	-2.92813
HR629S015	29	HR629S	-0.32433	-2.14009	-2.46442
HR629S016	29	HR629S	1.69951	-2.14009	-0.440575
HR629S017	29	HR629S	-2.75918	-2.14009	-4.89926
HR629S018	29	HR629S	0.828072	-2.14009	-1.31201
HR629S019	29	HR629S	0.0570239	-2.14009	-2.08306
HR629S020	29	HR629S	2.86034	-2.14009	0.720252
HR629S021	29	HR629S	0.260668	-2.14009	-1.87942
HR629S022	29	HR629S	-0.394421	-2.14009	-2.53451
HR629S023	29	HR629S	0.512036	-2.14009	-1.62805
HR629S024	29	HR629S	-0.806145	-2.14009	-2.94623
HR629S025	29	HR629S	-2.70784	-2.14009	-4.84793
HR629S026	29	HR629S	-1.84096	-2.14009	-3.98105
HR629S027	29	HR629S	0.29139	-2.14009	-1.8487
HR629S029	29	HR629S	3.29209	-2.14009	1.15201
HR629S030	29	HR629S	-1.17705	-2.14009	-3.31713
HR629S031	29	HR629S	0.339096	-2.14009	-1.80099
HR629S032	29	HR629S	2.25129	-2.14009	0.111201
HR629S033	29	HR629S	2.16215	-2.14009	0.0220612
HR629S034	29	HR629S	-1.05406	-2.14009	-3.19414
HR629S035	29	HR629S	-0.331441	-2.14009	-2.47153
HR629S036	29	HR629S	-0.966076	-2.14009	-3.10616
HR629S037	29	HR629S	0.15442	-2.14009	-1.98567
HR629S038	29	HR629S	-0.786849	-2.14009	-2.92694
HR629S039	29	HR629S	-2.37284	-2.14009	-4.51292
HR629S040	29	HR629S	2.48189	-2.14009	0.341804
HR629S041	29	HR629S	0.0725392	-2.14009	-2.06755
HR629S042	29	HR629S	0.320078	-2.14009	-1.82001
HR629S043	29	HR629S	3.2295	-2.14009	1.08941
HR629S044	29	HR629S	-1.98187	-2.14009	-4.12196
HR629S045	29	HR629S	-1.94074	-2.14009	-4.08083
HR629S046	29	HR629S	-0.295735	-2.14009	-2.43582
HR629S047	29	HR629S	-0.38726	-2.14009	-2.52735
HR629S048	29	HR629S	-0.936677	-2.14009	-3.07676
HR629S049	29	HR629S	1.90152	-2.14009	-0.238565
HR629S050	29	HR629S	0.244043	-2.14009	-1.89604
HR629S051	29	HR629S	0.0175966	-2.14009	-2.12249
HR629S052	29	HR629S	-0.234691	-2.14009	-2.37478
HR629S053	29	HR629S	4.46542	-2.14009	2.32534
HR629S054	29	HR629S	0.575734	-2.14009	-1.56435
HR629S055	29	HR629S	-3.4255	-2.14009	-5.56559
HR629S056	29	HR629S	-0.772957	-2.14009	-2.91304
HR629S057	29	HR629S	-0.235203	-2.14009	-2.37529
HR629S058	29	HR629S	1.86819	-2.14009	-0.271893
HR629S059	29	HR629S	-0.877043	-2.14009	-3.01713
HR629S060	29	HR629S	1.07688	-2.14009	-1.0632
HR629S061	29	HR629S	-3.0217	-2.14009	-5.16179
HR629S062	29	HR629S	-0.3034	-2.14009	-2.44349
HR629S063	29	HR629S	1.34938	-2.14009	-0.790709
HR629S064	29	HR629S	-1.22695	-2.14009	-3.36704
HR629S065	29	HR629S	-1.89447	-2.14009	-4.03456
HR629S066	29	HR629S	0.901103	-2.14009	-1.23898
HR629S067	29	HR629S	0.35979	-2.14009	-1.7803
HR629S068	29	HR629S	3.69317	-2.14009	1.55308
HR629S069	29	HR629S	0.0318329	-2.14009	-2.10825
HR629S070	29	HR629S	-0.429847	-2.14009	-2.56993
HR629S071	29	HR629S	-0.113498	-2.14009	-2.25358
HR629S072	29	HR629S	-0.461647	-2.14009	-2.60173
HR630S002	30	HR630S	-5.83048	-1.73759	-7.56807
HR630S003	30	HR630S	-5.87579	-1.73759	-7.61338
HR630S004	30	HR630S	-1.30314	-1.73759	-3.04073
HR630S005	30	HR630S	5.8106	-1.73759	4.07301
HR630S006	30	HR630S	10.1428	-1.73759	8.4052
HR630S007	30	HR630S	-6.30884	-1.73759	-8.04642
HR630S008	30	HR630S	0.686443	-1.73759	-1.05114
HR630S009	30	HR630S	4.83246	-1.73759	3.09487
HR630S010	30	HR630S	10.6061	-1.73759	8.86849
HR630S011	30	HR630S	-3.74661	-1.73759	-5.48419
HR630S012	30	HR630S	4.55598	-1.73759	2.8184
HR630S013	30	HR630S	-5.58561	-1.73759	-7.32319
HR630S014	30	HR630S	0.396098	-1.73759	-1.34149
HR630S015	30	HR630S	-4.51755	-1.73759	-6.25513
HR630S016	30	HR630S	-5.01873	-1.73759	-6.75632
HR630S017	30	HR630S	2.70958	-1.73759	0.971997
HR630S018	30	HR630S	-0.0896876	-1.73759	-1.82727
HR630S021	30	HR630S	-4.31678	-1.73759	-6.05436
HR630S022	30	HR630S	0.0384244	-1.73759	-1.69916
HR630S023	30	HR630S	-5.62611	-1.73759	-7.3637
HR630S024	30	HR630S	-1.79854	-1.73759	-3.53613
HR630S025	30	HR630S	-0.785761	-1.73759	-2.52335
HR630S026	30	HR630S	5.55199	-1.73759	3.8144
HR630S027	30	HR630S	-3.20065	-1.73759	-4.93823
HR630S028	30	HR630S	4.11605	-1.73759	2.37846
HR630S029	30	HR630S	-2.06624	-1.73759	-3.80383
HR630S030	30	HR630S	6.3036	-1.73759	4.56602
HR630S031	30	HR630S	6.66796	-1.73759	4.93038
HR630S032	30	HR630S	-0.681984	-1.73759	-2.41957
HR630S033	30	HR630S	2.48884	-1.73759	0.751251
HR630S034	30	HR630S	-6.44131	-1.73759	-8.1789
HR630S035	30	HR630S	1.59871	-1.73759	-0.138875
HR630S036	30	HR630S	3.69516	-1.73759	1.95758
HR630S037	30	HR630S	4.66688	-1.73759	2.92929
HR630S038	30	HR630S	9.61918	-1.73759	7.8816
HR630S039	30	HR630S	-0.533826	-1.73759	-2.27141
HR630S040	30	HR630S	2.94462	-1.73759	1.20703
HR630S041	30	HR630S	2.95846	-1.73759	1.22088
HR630S042	30	HR630S	-6.03804	-1.73759	-7.77562
HR630S043	30	HR630S	-3.90029	-1.73759	-5.63788
HR630S044	30	HR630S	3.35822	-1.73759	1.62063
HR630S045	30	HR630S	-3.72054	-1.73759	-5.45813
HR630S046	30	HR630S	-3.3905	-1.73759	-5.12809
HR630S047	30	HR630S	3.90888	-1.73759	2.17129
HR630S048	30	HR630S	0.184057	-1.73759	-1.55353
HR630S049	30	HR630S	2.72808	-1.73759	0.990499
HR630S050	30	HR630S	-0.349947	-1.73759	-2.08753
HR630S051	30	HR630S	-5.91525	-1.73759	-7.65283
HR630S052	30	HR630S	-2.07635	-1.73759	-3.81393
HR630S053	30	HR630S	-7.0608	-1.73759	-8.79839
HR630S054	30	HR630S	6.83183	-1.73759	5.09425
HR631S001	31	HR631S	6.51004	-2.17888	4.33116
HR631S003	31	HR631S	7.07972	-2.17888	4.90084
HR631S004	31	HR631S	-2.27041	-2.17888	-4.44929
HR631S005	31	HR631S	0.688394	-2.17888	-1.49049
HR631S006	31	HR631S	0.742958	-2.17888	-1.43592
HR631S007	31	HR631S	-3.1324	-2.17888	-5.31128
HR631S008	31	HR631S	1.37103	-2.17888	-0.807847
HR631S009	31	HR631S	2.86601	-2.17888	0.687125
HR631S010	31	HR631S	6.40023	-2.17888	4.22135
HR631S011	31	HR631S	-2.21431	-2.17888	-4.39319
HR631S012	31	HR631S	-0.580817	-2.17888	-2.7597
HR631S013	31	HR631S	-6.13959	-2.17888	-8.31848
HR631S014	31	HR631S	8.5529	-2.17888	6.37402
HR631S015	31	HR631S	3.89267	-2.17888	1.71379
HR631S016	31	HR631S	-4.59538	-2.17888	-6.77426
HR631S017	31	HR631S	1.71424	-2.17888	-0.464638
HR631S018	31	HR631S	-0.413187	-2.17888	-2.59207
HR631S019	31	HR631S	4.83914	-2.17888	2.66026
HR631S020	31	HR631S	-3.23175	-2.17888	-5.41063
HR631S021	31	HR631S	-4.06837	-2.17888	-6.24725
HR631S022	31	HR631S	3.22457	-2.17888	1.04569
HR631S023	31	HR631S	-5.91876	-2.17888	-8.09764
HR631S024	31	HR631S	1.47006	-2.17888	-0.708825
HR631S025	31	HR631S	-0.362471	-2.17888	-2.54135
HR631S026	31	HR631S	-7.16543	-2.17888	-9.34431
HR631S027	31	HR631S	-6.9485	-2.17888	-9.12738
HR631S028	31	HR631S	-0.416884	-2.17888	-2.59577
HR631S029	31	HR631S	-3.7524	-2.17888	-5.93128
HR631S031	31	HR631S	-3.99961	-2.17888	-6.1785
HR631S033	31	HR631S	-3.8742	-2.17888	-6.05309
HR631S034	31	HR631S	-3.02689	-2.17888	-5.20577
HR631S035	31	HR631S	3.62985	-2.17888	1.45097
HR631S037	31	HR631S	11.8892	-2.17888	9.71027
HR631S038	31	HR631S	0.944359	-2.17888	-1.23452
HR631S040	31	HR631S	0.873414	-2.17888	-1.30547
HR631S041	31	HR631S	-1.15758	-2.17888	-3.33646
HR631S042	31	HR631S	4.39343	-2.17888	2.21455
HR631S043	31	HR631S	-2.56041	-2.17888	-4.73929
HR631S044	31	HR631S	2.81953	-2.17888	0.640644
HR631S045	31	HR631S	3.49764	-2.17888	1.31876
HR631S046	31	HR631S	1.39589	-2.17888	-0.782994
HR631S047	31	HR631S	4.95181	-2.17888	2.77293
HR631S048	31	HR631S	-4.96151	-2.17888	-7.14039
HR631S049	31	HR631S	-3.43065	-2.17888	-5.60953
HR631S050	31	HR631S	1.08091	-2.17888	-1.09797
HR631S051	31	HR631S	2.99373	-2.17888	0.814851
HR631S052	31	HR631S	-0.852009	-2.17888	-3.03089
HR631S053	31	HR631S	5.16969	-2.17888	2.99081
HR631S054	31	HR631S	8.35093	-2.17888	6.17204
HR631S055	31	HR631S	0.0563905	-2.17888	-2.12249
HR631S056	31	HR631S	-4.15065	-2.17888	-6.32953
HR632S001	32	HR632S	-1.70024	-2.32565	-4.0259
HR632S002	32	HR632S	1.50642	-2.32565	-0.819234
HR632S003	32	HR632S	1.86881	-2.32565	-0.456847
HR632S004	32	HR632S	2.75953	-2.32565	0.433875
HR632S005	32	HR632S	-1.33797	-2.32565	-3.66362
HR632S006	32	HR632S	-0.983057	-2.32565	-3.30871
HR632S007	32	HR632S	2.66442	-2.32565	0.338769
HR632S008	32	HR632S	-2.16456	-2.32565	-4.49022
HR632S009	32	HR632S	0.0964671	-2.32565	-2.22919
HR632S010	32	HR632S	-3.63931	-2.32565	-5.96496
HR632S011	32	HR632S	-4.18025	-2.32565	-6.5059
HR632S012	32	HR632S	-3.14237	-2.32565	-5.46802
HR632S013	32	HR632S	3.46366	-2.32565	1.13801
HR632S014	32	HR632S	2.15095	-2.32565	-0.174701
HR632S015	32	HR632S	1.22385	-2.32565	-1.1018
HR632S016	32	HR632S	-0.380248	-2.32565	-2.7059
HR632S017	32	HR632S	-0.676693	-2.32565	-3.00235
HR632S020	32	HR632S	-0.756398	-2.32565	-3.08205
HR632S021	32	HR632S	2.34203	-2.32565	0.0163789
HR632S022	32	HR632S	-1.06871	-2.32565	-3.39436
HR632S024	32	HR632S	1.8337	-2.32565	-0.491953
HR632S025	32	HR632S	-0.0112988	-2.32565	-2.33695
HR632S026	32	HR632S	-2.3651	-2.32565	-4.69075
HR632S027	32	HR632S	0.622675	-2.32565	-1.70298
HR632S028	32	HR632S	1.66364	-2.32565	-0.662017
HR632S029	32	HR632S	-2.03678	-2.32565	-4.36244
HR632S030	32	HR632S	-1.39297	-2.32565	-3.71863
HR632S031	32	HR632S	2.04364	-2.32565	-0.282009
HR632S032	32	HR632S	-1.56388	-2.32565	-3.88953
HR632S033	32	HR632S	2.95982	-2.32565	0.634167
HR632S034	32	HR632S	0.837861	-2.32565	-1.48779
HR632S035	32	HR632S	-0.953022	-2.32565	-3.27867
HR632S036	32	HR632S	-0.404367	-2.32565	-2.73002
HR632S037	32	HR632S	-0.472234	-2.32565	-2.79789
HR632S038	32	HR632S	0.451802	-2.32565	-1.87385
HR632S039	32	HR632S	-1.9749	-2.32565	-4.30055
HR632S040	32	HR632S	-0.578255	-2.32565	-2.90391
HR632S041	32	HR632S	-0.741703	-2.32565	-3.06736
HR632S042	32	HR632S	-2.22995	-2.32565	-4.5556
HR632S043	32	HR632S	2.85544	-2.32565	0.52979
HR632S044	32	HR632S	0.768016	-2.32565	-1.55764
HR632S045	32	HR632S	-0.485904	-2.32565	-2.81156
HR632S046	32	HR632S	-0.773364	-2.32565	-3.09902
HR632S047	32	HR632S	0.592219	-2.32565	-1.73343
HR632S048	32	HR632S	0.0826505	-2.32565	-2.243
HR632S049	32	HR632S	0.0460658	-2.32565	-2.27959
HR632S050	32	HR632S	-1.40795	-2.32565	-3.7336
HR632S051	32	HR632S	3.36013	-2.32565	1.03448
HR632S052	32	HR632S	3.12982	-2.32565	0.804173
HR632S053	32	HR632S	1.62166	-2.32565	-0.703989
HR632S054	32	HR632S	-0.78785	-2.32565	-3.1135
HR632S055	32	HR632S	-1.83895	-2.32565	-4.1646
HR632S056	32	HR632S	3.37723	-2.32565	1.05158
HR632S057	32	HR632S	-0.182035	-2.32565	-2.50769
HR632S059	32	HR632S	-0.215398	-2.32565	-2.54105
HR632S060	32	HR632S	-0.413468	-2.32565	-2.73912
HR632S061	32	HR632S	-1.19107	-2.32565	-3.51672
HR632S062	32	HR632S	-0.713892	-2.32565	-3.03954
HR633S001	33	HR633S	6.92573	-4.88328	2.04245
HR633S002	33	HR633S	-0.132125	-4.88328	-5.01541
HR633S003	33	HR633S	-5.42052	-4.88328	-10.3038
HR633S004	33	HR633S	0.888263	-4.88328	-3.99502
HR633S005	33	HR633S	2.09342	-4.88328	-2.78987
HR633S006	33	HR633S	-1.25349	-4.88328	-6.13677
HR633S007	33	HR633S	-3.88393	-4.88328	-8.76722
HR633S008	33	HR633S	-0.0495309	-4.88328	-4.93281
HR633S009	33	HR633S	-0.105786	-4.88328	-4.98907
HR633S010	33	HR633S	-4.31455	-4.88328	-9.19783
HR633S011	33	HR633S	-1.26139	-4.88328	-6.14467
HR633S012	33	HR633S	-3.24047	-4.88328	-8.12375
HR633S013	33	HR633S	-0.399439	-4.88328	-5.28272
HR633S014	33	HR633S	-0.303302	-4.88328	-5.18658
HR633S015	33	HR633S	0.859241	-4.88328	-4.02404
HR633S016	33	HR633S	-5.79873	-4.88328	-10.682
HR633S017	33	HR633S	0.0431542	-4.88328	-4.84013
HR633S018	33	HR633S	-5.3544	-4.88328	-10.2377
HR633S019	33	HR633S	0.841465	-4.88328	-4.04182
HR633S022	33	HR633S	-0.0645488	-4.88328	-4.94783
HR633S023	33	HR633S	1.74672	-4.88328	-3.13656
HR633S024	33	HR633S	6.01525	-4.88328	1.13196
HR633S025	33	HR633S	0.229722	-4.88328	-4.65356
HR633S026	33	HR633S	2.1063	-4.88328	-2.77699
HR633S027	33	HR633S	-0.373518	-4.88328	-5.2568
HR633S028	33	HR633S	0.322593	-4.88328	-4.56069
HR633S029	33	HR633S	2.39618	-4.88328	-2.4871
HR633S030	33	HR633S	-5.2311	-4.88328	-10.1144
HR633S032	33	HR633S	4.34144	-4.88328	-0.541837
HR633S035	33	HR633S	-1.47394	-4.88328	-6.35722
HR633S036	33	HR633S	-5.1019	-4.88328	-9.98518
HR633S037	33	HR633S	-2.96316	-4.88328	-7.84644
HR633S038	33	HR633S	11.6977	-4.88328	6.81446
HR633S039	33	HR633S	-3.38522	-4.88328	-8.2685
HR633S040	33	HR633S	2.83837	-4.88328	-2.04492
HR633S044	33	HR633S	1.21518	-4.88328	-3.6681
HR633S045	33	HR633S	-5.45625	-4.88328	-10.3395
HR633S046	33	HR633S	-3.23102	-4.88328	-8.1143
HR633S047	33	HR633S	-1.29836	-4.88328	-6.18164
HR633S048	33	HR633S	4.07317	-4.88328	-0.810108
HR633S049	33	HR633S	5.50841	-4.88328	0.625125
HR633S050	33	HR633S	5.52715	-4.88328	0.643866
HR633S051	33	HR633S	1.86845	-4.88328	-3.01483
HR633S052	33	HR633S	1.79303	-4.88328	-3.09026
HR633S053	33	HR633S	-3.63339	-4.88328	-8.51667
HR633S054	33	HR633S	-5.25839	-4.88328	-10.1417
HR633S055	33	HR633S	0.407002	-4.88328	-4.47628
HR633S056	33	HR633S	-3.58905	-4.88328	-8.47233
HR633S057	33	HR633S	1.14651	-4.88328	-3.73677
HR633S058	33	HR633S	3.8068	-4.88328	-1.07648
HR633S059	33	HR633S	-5.57627	-4.88328	-10.4596
HR633S060	33	HR633S	2.40564	-4.88328	-2.47764
HR633S061	33	HR633S	0.589454	-4.88328	-4.29383
HR633S062	33	HR633S	3.07778	-4.88328	-1.8055
HR633S063	33	HR633S	-6.19829	-4.88328	-11.0816
HR633S064	33	HR633S	-6.10077	-4.88328	-10.9841
HR633S065	33	HR633S	0.00946318	-4.88328	-4.87382
HR633S066	33	HR633S	1.89653	-4.88328	-2.98676
HR633S067	33	HR633S	1.10326	-4.88328	-3.78002
HR634S001	34	HR634S	-6.47101	-0.614508	-7.08552
HR634S002	34	HR634S	9.12695	-0.614508	8.51244
HR634S003	34	HR634S	6.60958	-0.614508	5.99508
HR634S005	34	HR634S	7.49872	-0.614508	6.88421
HR634S006	34	HR634S	3.12254	-0.614508	2.50804
HR634S007	34	HR634S	5.04936	-0.614508	4.43485
HR634S008	34	HR634S	7.78957	-0.614508	7.17506
HR634S009	34	HR634S	-1.4486	-0.614508	-2.06311
HR634S010	34	HR634S	6.44759	-0.614508	5.83308
HR634S011	34	HR634S	-4.95967	-0.614508	-5.57417
HR634S012	34	HR634S	-1.63983	-0.614508	-2.25434
HR634S013	34	HR634S	0.949787	-0.614508	0.335278
HR634S015	34	HR634S	-6.02468	-0.614508	-6.63919
HR634S016	34	HR634S	0.313121	-0.614508	-0.301388
HR634S017	34	HR634S	-4.8039	-0.614508	-5.41841
HR634S018	34	HR634S	-3.08751	-0.614508	-3.70202
HR634S021	34	HR634S	0.496031	-0.614508	-0.118478
HR634S022	34	HR634S	-1.01643	-0.614508	-1.63094
HR634S023	34	HR634S	10.3692	-0.614508	9.75467
HR634S024	34	HR634S	-5.80318	-0.614508	-6.41768
HR634S025	34	HR634S	0.0259422	-0.614508	-0.588566
HR634S026	34	HR634S	-2.8108	-0.614508	-3.42531
HR634S027	34	HR634S	12.8446	-0.614508	12.2301
HR634S028	34	HR634S	5.79064	-0.614508	5.17613
HR634S029	34	HR634S	4.04643	-0.614508	3.43192
HR634S030	34	HR634S	0.44484	-0.614508	-0.169668
HR634S031	34	HR634S	1.61873	-0.614508	1.00422
HR634S032	34	HR634S	-0.852456	-0.614508	-1.46696
HR634S033	34	HR634S	-2.74169	-0.614508	-3.3562
HR634S034	34	HR634S	-0.271093	-0.614508	-0.885601
HR634S035	34	HR634S	0.473944	-0.614508	-0.140564
HR634S037	34	HR634S	3.18438	-0.614508	2.56987
HR634S038	34	HR634S	6.48557	-0.614508	5.87107
HR634S039	34	HR634S	-6.50107	-0.614508	-7.11557
HR634S040	34	HR634S	2.319	-0.614508	1.70449
HR634S041	34	HR634S	-6.57476	-0.614508	-7.18927
HR634S042	34	HR634S	-0.735858	-0.614508	-1.35037
HR634S043	34	HR634S	-3.34839	-0.614508	-3.9629
HR634S044	34	HR634S	2.05123	-0.614508	1.43672
HR634S045	34	HR634S	2.44798	-0.614508	1.83347
HR634S046	34	HR634S	3.0806	-0.614508	2.4661
HR634S047	34	HR634S	-3.40054	-0.614508	-4.01505
HR634S048	34	HR634S	-8.61137	-0.614508	-9.22588
HR634S049	34	HR634S	-3.06388	-0.614508	-3.67838
HR634S050	34	HR634S	-3.41929	-0.614508	-4.0338
HR634S051	34	HR634S	-8.793	-0.614508	-9.40751
HR634S052	34	HR634S	1.03632	-0.614508	0.421812
HR634S053	34	HR634S	-0.882337	-0.614508	-1.49685
HR635S001	35	HR635S	3.56289	-0.801991	2.7609
HR635S002	35	HR635S	3.84952	-0.801991	3.04753
HR635S003	35	HR635S	4.06195	-0.801991	3.25996
HR635S004	35	HR635S	2.35793	-0.801991	1.55593
HR635S005	35	HR635S	3.45652	-0.801991	2.65453
HR635S006	35	HR635S	-0.144732	-0.801991	-0.946723
HR635S007	35	HR635S	7.18685	-0.801991	6.38485
HR635S009	35	HR635S	-4.62167	-0.801991	-5.42366
HR635S010	35	HR635S	1.89374	-0.801991	1.09175
HR635S011	35	HR635S	-3.03742	-0.801991	-3.83941
HR635S012	35	HR635S	0.550271	-0.801991	-0.25172
HR635S013	35	HR635S	-6.02635	-0.801991	-6.82834
HR635S014	35	HR635S	-2.27162	-0.801991	-3.07361
HR635S015	35	HR635S	-1.41082	-0.801991	-2.21281
HR635S016	35	HR635S	-4.69084	-0.801991	-5.49283
HR635S017	35	HR635S	-0.424596	-0.801991	-1.22659
HR635S018	35	HR635S	-6.81044	-0.801991	-7.61243
HR635S019	35	HR635S	5.94578	-0.801991	5.14378
HR635S020	35	HR635S	-1.97902	-0.801991	-2.78101
HR635S022	35	HR635S	3.16801	-0.801991	2.36601
HR635S024	35	HR635S	0.387186	-0.801991	-0.414805
HR635S025	35	HR635S	1.66918	-0.801991	0.867193
HR635S026	35	HR635S	-8.78626	-0.801991	-9.58825
HR635S028	35	HR635S	2.69556	-0.801991	1.89357
HR635S029	35	HR635S	6.56007	-0.801991	5.75808
HR635S030	35	HR635S	-3.17529	-0.801991	-3.97728
HR635S031	35	HR635S	-2.75716	-0.801991	-3.55915
HR635S032	35	HR635S	-7.36745	-0.801991	-8.16944
HR635S033	35	HR635S	1.48416	-0.801991	0.682171
HR635S034	35	HR635S	8.53618	-0.801991	7.73419
HR635S035	35	HR635S	-5.64759	-0.801991	-6.44958
HR635S036	35	HR635S	2.77972	-0.801991	1.97773
HR635S037	35	HR635S	-1.90546	-0.801991	-2.70746
HR635S038	35	HR635S	7.0686	-0.801991	6.2666
HR635S039	35	HR635S	0.588515	-0.801991	-0.213476
HR635S040	35	HR635S	-3.04881	-0.801991	-3.8508
HR635S041	35	HR635S	-0.619936	-0.801991	-1.42193
HR635S042	35	HR635S	1.52849	-0.801991	0.726501
HR635S043	35	HR635S	3.38016	-0.801991	2.57817
HR635S044	35	HR635S	-4.40487	-0.801991	-5.20686
HR635S045	35	HR635S	1.37183	-0.801991	0.569841
HR635S046	35	HR635S	2.57831	-0.801991	1.77632
HR635S047	35	HR635S	-1.7663	-0.801991	-2.56829
HR635S048	35	HR635S	-0.436885	-0.801991	-1.23888
HR635S049	35	HR635S	5.42853	-0.801991	4.62654
HR635S050	35	HR635S	7.4193	-0.801991	6.61731
HR635S051	35	HR635S	5.52262	-0.801991	4.72063
HR635S052	35	HR635S	-2.09179	-0.801991	-2.89378
HR635S053	35	HR635S	0.19005	-0.801991	-0.611941
HR635S054	35	HR635S	-3.21912	-0.801991	-4.02111
HR635S055	35	HR635S	-2.32848	-0.801991	-3.13047
HR635S056	35	HR635S	1.17451	-0.801991	0.372514
HR635S057	35	HR635S	6.12167	-0.801991	5.31968
HR635S059	35	HR635S	0.577237	-0.801991	-0.224754
HR635S060	35	HR635S	0.307171	-0.801991	-0.49482
HR635S065	35	HR635S	-3.87291	-0.801991	-4.6749
HR635S066	35	HR635S	2.573	-0.801991	1.77101
HR635S067	35	HR635S	-1.99849	-0.801991	-2.80048
HR636S001	36	HR636S	-5.69429	-3.67242	-9.36671
HR636S002	36	HR636S	0.336988	-3.67242	-3.33543
HR636S003	36	HR636S	3.10603	-3.67242	-0.566388
HR636S004	36	HR636S	6.43442	-3.67242	2.76201
HR636S006	36	HR636S	1.02694	-3.67242	-2.64547
HR636S008	36	HR636S	-2.32271	-3.67242	-5.99513
HR636S009	36	HR636S	1.93845	-3.67242	-1.73396
HR636S010	36	HR636S	-2.76844	-3.67242	-6.44085
HR636S011	36	HR636S	-1.19883	-3.67242	-4.87124
[truncated: 3,190 more rows]
